# Supplementary material for: Defining the pathway to timely diagnosis and treatment of interstitial lung disease: a US Delphi survey
Source: PubMed Central journal article supplement — BMJ Open Respir Res. 2023 Nov 24;10(1):e001594. doi: 10.1136/bmjresp-2022-001594 (PMC10680004; doi:10.1136/bmjresp-2022-001594), 2023-11-24
Supplement: bmjresp-2022-001594supp001.pdf [file bmjresp-2022-001594supp001.pdf]

1

**Supplement**2 **Defining the pathway to timely diagnosis and treatment of interstitial lung disease: a**3 **US Delphi survey**4 Amy Hajai Case<sup>1</sup>, Scott Beegle<sup>2</sup>, David L Hotchkin<sup>3</sup>, Thomas Kaelin<sup>4</sup>, Hyun Joo Kim<sup>5</sup>, Anna J5 Podolanczuk<sup>6</sup>, Murali Ramaswamy<sup>7</sup>, Carlos Remolina<sup>8</sup>, Mary M Salvatore<sup>9</sup>, Conan Tu<sup>10</sup>,6 Joao de Andrade<sup>11</sup>7 <sup>1</sup>Pulmonary, Critical Care, and Sleep Medicine, Piedmont Healthcare, Atlanta, GA, USA;8 <sup>2</sup>Division of Pulmonary & Critical Care Medicine, Albany Medical College, Albany, NY, USA;9 <sup>3</sup>The Oregon Clinic, Division of Pulmonary, Critical Care & Sleep Medicine, Portland, OR,10 USA; <sup>4</sup>Lowcountry Lung and Critical Care, Charleston, SC, USA; <sup>5</sup>Department of Medicine,

11 Division of Pulmonary, Allergy, Critical Care, and Sleep, University of Minnesota,

12 Minneapolis, MN, USA; <sup>6</sup>Department of Medicine, Weill Cornell Medical College, New York,13 NY, USA; <sup>7</sup>LeBauer Pulmonary and Critical Care and PulmonIx, LLC at Cone Health,14 Greensboro, NC, USA; <sup>8</sup>Department of Pulmonology, Trinitas Regional Medical Center,15 Elizabeth, NJ, USA; <sup>9</sup>Department of Radiology, Columbia University Irving Medical Center,16 New York, NY, USA; <sup>10</sup>Internal Medicine, ProHEALTH, part of Optum, Bethpage, NY, USA;17 <sup>11</sup>Vanderbilt University Medical Center, Nashville, TN, USA.

18

19 **Supplementary Results Table S1.** Delphi panel demographics

|                                                                        | <b>Overall<br/>(n=49)</b> | <b>Survey 1<br/>(n=48)</b> | <b>Survey 2<br/>(n=40)*</b> | <b>Survey 3<br/>(n=36)</b> |
|------------------------------------------------------------------------|---------------------------|----------------------------|-----------------------------|----------------------------|
| <b>Primary specialty</b>                                               |                           |                            |                             |                            |
| <b>Pulmonary +/- critical care medicine</b>                            | 43 (87.8%)                | 42 (87.5%)                 | 35 (87.5%)                  | 32 (88.9%)                 |
| Academic/teaching hospital                                             | 20 (40.8%)                | 20 (41.7%)                 | 19 (47.5%)                  | 18 (50.0%)                 |
| Community                                                              | 23 (46.9%)                | 22 (45.8%)                 | 16 (40.0%)                  | 14 (38.9%) <sup>†</sup>    |
| <b>Primary care: Internal medicine</b>                                 | 2 (4.1%)                  | 2 (4.2%)                   | 1 (2.5%)                    | 1 (2.8%)                   |
| Academic/teaching hospital                                             | 1 (2.0%)                  | 1 (2.1%)                   | 1 (2.5%)                    | 1 (2.8%)                   |
| Community                                                              | 1 (2.0%)                  | 1 (2.1%)                   | 0 (0.0%)                    | 0 (0.0%)                   |
| <b>Primary care: Family medicine</b>                                   | 4 (8.2%)                  | 4 (8.3%)                   | 4 (10.0%)                   | 3 (8.3%)                   |
| Academic/teaching hospital                                             | 1 (2.0%)                  | 1 (2.1%)                   | 1 (2.5%)                    | 1 (2.8%)                   |
| Community                                                              | 3 (6.1%)                  | 3 (6.3%)                   | 3 (7.5%)                    | 2 (5.6%)                   |
| <b>Years involved in caring for patients with respiratory symptoms</b> |                           |                            |                             |                            |
| 5 years <sup>‡</sup>                                                   | 5 (10.2%)                 | 5 (10.4%)                  | 4 (10.0%)                   | 4 (11.1%)                  |
| 6–10 years                                                             | 12 (24.5%)                | 12 (25.0%)                 | 10 (25.0%)                  | 10 (27.8%)                 |
| 11–15 years                                                            | 10 (20.4%)                | 10 (20.8%)                 | 8 (20.0%)                   | 7 (19.4%)                  |
| >15 years                                                              | 22 (44.9%)                | 21 (43.8%)                 | 18 (45.0%)                  | 15 (41.7%) <sup>†</sup>    |

|                                                                                | Overall<br>(n=49) | Survey 1<br>(n=48) | Survey 2<br>(n=40)* | Survey 3<br>(n=36)      |
|--------------------------------------------------------------------------------|-------------------|--------------------|---------------------|-------------------------|
| <b>Number of patients with ILD diagnosed/managed/treated in past 12 months</b> |                   |                    |                     |                         |
| <b>Pulmonologists</b>                                                          |                   |                    |                     |                         |
| 1–50                                                                           | 25 (51.0%)        | 25 (52.1%)         | 19 (47.5%)          | 17 (47.2%)              |
| 51–100                                                                         | 10 (20.4%)        | 10 (20.8%)         | 8 (20.0%)           | 7 (19.4%)               |
| 101–150                                                                        | 4 (8.2%)          | 4 (8.3%)           | 4 (10.0%)           | 3 (8.3%)                |
| 151–200                                                                        | 2 (4.1%)          | 2 (4.2%)           | 2 (5.0%)            | 2 (5.6%)                |
| >200                                                                           | 7 (14.3%)         | 7 (14.6%)          | 7 (17.5%)           | 6 (16.7%)               |
| Unknown                                                                        | 1 (2.0%)          | 0 (0.0%)           | 0 (0.0%)            | 1 (2.8%) <sup>†</sup>   |
| <b>Geographic location of practice</b>                                         |                   |                    |                     |                         |
| West                                                                           | 6 (12.2%)         | 6 (12.5%)          | 6 (15.0%)           | 5 (13.9)                |
| Midwest                                                                        | 4 (8.2%)          | 4 (8.3%)           | 3 (7.5%)            | 3 (8.3%)                |
| South                                                                          | 22 (44.9%)        | 22 (45.8%)         | 17 (42.5%)          | 13 (36.1%)              |
| Northeast                                                                      | 17 (34.7%)        | 16 (33.3%)         | 14 (35.0%)          | 15 (41.7%) <sup>‡</sup> |

20 \*Two panellists provided partial responses, which were included in the analysis.

21 †One panellist completed Survey 3 without completing Surveys 1 and 2.

22 ‡Pulmonologists with 4 years of clinical experience were included if they had 1 year of  
23 clinical experience during their fellowship that was ILD-focused.

24 ILD, interstitial lung disease.

25

26 **Supplementary Results Table S2.** Consensus statements

| <b>Consensus statement</b>                                                                                                                                        | <b>Number of responses</b> | <b>Level of consensus agreement</b> |
|-------------------------------------------------------------------------------------------------------------------------------------------------------------------|----------------------------|-------------------------------------|
| <b>1. Guidelines</b>                                                                                                                                              |                            |                                     |
| The current guidelines on the diagnosis and management of ILD are not completely clear.                                                                           | 36                         | 94.4%                               |
| There is a need for increased awareness and education around ILD for patients and PCPs.                                                                           | 40                         | 100%                                |
| There is a need for guidelines for PCPs that include when to suspect ILD and when to refer to a pulmonologist.                                                    | 40                         | 100%                                |
| PCPs need more guidance on PFTs.                                                                                                                                  | 38                         | 100%                                |
| There is a need for increased awareness and education around ILD for pulmonologists and rheumatologists.                                                          | 36                         | 97.2%                               |
| Pulmonologists need further guidance on how to manage and when to refer patients with ILD.                                                                        | 35                         | 94.3%                               |
| Radiologists need additional guidance on what to include in CT reports.                                                                                           | 37                         | 94.6%                               |
| ILD centres need improved guidance on co-management of patients with ILD.                                                                                         | 36                         | 97.2%                               |
| <b>2. Community screening</b>                                                                                                                                     |                            |                                     |
| PCPs should consider ILD in patients with chronic cough and/or dyspnoea when cardiac disease, asthma, bronchitis, and allergies have been ruled out as the cause. | 36                         | 97.2%                               |

| <b>Consensus statement</b>                                                                                                                                                                                                                                                   | <b>Number of responses</b> | <b>Level of consensus agreement</b> |
|------------------------------------------------------------------------------------------------------------------------------------------------------------------------------------------------------------------------------------------------------------------------------|----------------------------|-------------------------------------|
| In the primary care setting, ILD should be considered in patients with any of the following unexplained symptoms: chronic cough, dyspnoea, crackles on auscultation, clubbing on fingernails, oxygen desaturation with ambulation, or hypoxemia at rest.                     | 36                         | 97.2%                               |
| Patients presenting with chronic cough and dyspnoea in the primary care setting should be asked questions in review of systems about CTD.                                                                                                                                    | 35                         | 94.3%                               |
| For patients presenting with a chronic cough and dyspnoea, spirometry (if available at PCP office), chest X-ray, and oximetry (including simple 500-foot ambulatory pulse oximetry with 3-point drop) should be ordered by the PCP.                                          | 35                         | 85.7%                               |
| PCPs need clearer guidance on ordering an HRCT scan for patients with suspected ILD.                                                                                                                                                                                         | 37                         | 100%                                |
| If ILD is suspected in a patient following workup, a PCP should order an HRCT scan prior to pulmonologist referral if they are familiar with the correct imaging technique to request and can ensure adequate quality.                                                       | 36                         | 94.4%                               |
| A different course of action should be considered after 1–3 months in patients with chronic cough and/or dyspnoea with normal FVC and chest X-ray who do not respond to prescribed treatment or management in primary care, and a pulmonology referral should be considered. | 36                         | 97.2%                               |

| <b>Consensus statement</b>                                                                                                                                                                                                                                              | <b>Number of responses</b> | <b>Level of consensus agreement</b> |
|-------------------------------------------------------------------------------------------------------------------------------------------------------------------------------------------------------------------------------------------------------------------------|----------------------------|-------------------------------------|
| PCPs, rheumatologists, and cardiologists should always consider ILD if a patient has cough, dyspnoea, and crackles on auscultation that are not explained by workup.                                                                                                    | 36                         | 100%                                |
| Patients presenting in primary or rheumatology care with clinical features including chronic dry/non-productive cough, dyspnoea, auscultatory crackles, and oxygen desaturation, which are not explained by workup, should be co-managed with a pulmonologist.          | 36                         | 100%                                |
| Cardiologists should consider concurrent workup or diagnostic testing with a pulmonologist for patients who do not have cardiac dysfunction and present with chronic dry/non-productive cough, dyspnoea, auscultatory crackles, or oxygen desaturation with ambulation. | 35                         | 100%                                |
| Patients with a CTD should be screened for ILD at baseline and then every 12–18 months depending on the underlying disease.                                                                                                                                             | 33                         | 90.9%                               |
| Patients with a history of scleroderma and no respiratory symptoms or crackles on lung auscultation should be screened for ILD using at least full PFTs (spirometry plus measurement of lung volumes and diffusion capacity).                                           | 38                         | 94.2%                               |
| Further research is needed to determine which patients with rheumatoid arthritis would benefit from HRCT screening.                                                                                                                                                     | 35                         | 94.3%                               |

| <b>Consensus statement</b>                                                                                                                                                                                                                           | <b>Number of responses</b> | <b>Level of consensus agreement</b> |
|------------------------------------------------------------------------------------------------------------------------------------------------------------------------------------------------------------------------------------------------------|----------------------------|-------------------------------------|
| Irrespective of respiratory symptoms, patients aged 50 years or older with a family history of familial pulmonary fibrosis should be screened for ILD using at least full PFTs (spirometry plus measurement of lung volumes and diffusion capacity). | 35                         | 83.9%                               |
| Further research and guidance are needed to determine whether patients with one single first-degree relative with pulmonary fibrosis/IIP in the family and no respiratory symptoms or crackles on lung auscultation should be screened for ILD.      | 36                         | 97.2%                               |
| <b>3. Community diagnosis</b>                                                                                                                                                                                                                        |                            |                                     |
| A pulmonologist should include medical history, physical examination, PFTs, serology, 6MWT, and HRCT in the workup of a patient with suspected ILD.                                                                                                  | 32                         | 96.9%                               |
| In patients with suspected ILD, questionnaires should be used to obtain a detailed medical history.                                                                                                                                                  | 33                         | 97.0%                               |
| When a specific ILD diagnosis is being considered, ILD-specific patient questionnaires should be used where possible.                                                                                                                                | 32                         | 93.8%                               |
| Serologic panel testing should always be ordered as part of the workup for ILD and should be used to facilitate a differential diagnosis.                                                                                                            | 32                         | 96.9%                               |
| It is important to make a specific ILD diagnosis whenever possible.                                                                                                                                                                                  | 33                         | 3 (1)*                              |

| <b>Consensus statement</b>                                                                                                                                                                                                                                                                                                                                              | <b>Number of responses</b> | <b>Level of consensus agreement</b> |
|-------------------------------------------------------------------------------------------------------------------------------------------------------------------------------------------------------------------------------------------------------------------------------------------------------------------------------------------------------------------------|----------------------------|-------------------------------------|
| In patients with non-specific ILD symptoms, the most important serologies to order are: ANA, CCP, RF, SSA, and Scl 70.                                                                                                                                                                                                                                                  | 31                         | 80.7%                               |
| For patients with a non-productive cough and dyspnoea, an HRCT scan should be ordered if not already available following referral to a pulmonologist if they have any one of the following: auscultatory crackles, clubbing of fingernails, oxygen desaturation with ambulation, bibasilar abnormalities on chest X-ray, abnormal FVC, abnormal DLco, or confirmed CTD. | 33                         | 100%                                |
| When sending an HRCT requisition for a patient with suspected ILD to radiology, it is important to specify whether expiratory, inspiratory, or both views are needed, whether prone, supine, or both images are needed, and that it needs to be presented in thin sections.                                                                                             | 31                         | 87.1%                               |
| Where possible, radiologists should use a standardized template for reporting HRCT results in ILD.                                                                                                                                                                                                                                                                      | 33                         | 2 (1)*                              |
| The most important elements to include in an HRCT report are the description of features and the probable diagnosis.                                                                                                                                                                                                                                                    | 33                         | 97.0%                               |
| MDDs should take place during the diagnosis of ILD if there is at least diagnostic uncertainty or if any lung biopsy is being considered.                                                                                                                                                                                                                               | 33                         | 93.9%                               |
| An MDD may not be required for cases of suspected ILD if there is no diagnostic uncertainty.                                                                                                                                                                                                                                                                            | 30                         | 86.7%                               |



| <b>Consensus statement</b>                                                                                                                                                                                                                             | <b>Number of responses</b> | <b>Level of consensus agreement</b> |
|--------------------------------------------------------------------------------------------------------------------------------------------------------------------------------------------------------------------------------------------------------|----------------------------|-------------------------------------|
| Local ILD multidisciplinary teams should consist of at least a pulmonologist, ideally a thoracic radiologist, a pathologist with expertise in ILD, and a rheumatologist when CTD is suspected.                                                         | 32                         | 100%                                |
| MDDs are most effective when all disciplines are involved (face to face or virtual).                                                                                                                                                                   | 33                         | 100%                                |
| <b>4. Community management</b>                                                                                                                                                                                                                         |                            |                                     |
| Pulmonologists should follow up with their ILD patients every 3–6 months, depending on the diagnosis and disease severity.                                                                                                                             | 32                         | 100%                                |
| At follow-up visits for patients with ILD, pulmonologists should evaluate disease progression, physical function, symptom severity, quality of life, suitability for clinical trials, suitability for lung transplant, and side effects of medication. | 33                         | 100%                                |
| Cough, dyspnoea, fatigue, and the emotional well-being of patients with ILD should be monitored regularly in patients with ILD.                                                                                                                        | 33 <sup>†</sup>            | 100%                                |
| Common comorbidities that should be monitored/assessed in patients with ILD are pulmonary hypertension, GERD, sleep disordered breathing, COPD, and lung cancer if appropriate.                                                                        | 33 <sup>†</sup>            | 100%                                |
| When following up with a patient with ILD, HRCT scans should be considered if clinical deterioration is observed.                                                                                                                                      | 32                         | 96.9%                               |

| <b>Consensus statement</b>                                                                                                                                                                                                                                                                     | <b>Number of responses</b> | <b>Level of consensus agreement</b> |
|------------------------------------------------------------------------------------------------------------------------------------------------------------------------------------------------------------------------------------------------------------------------------------------------|----------------------------|-------------------------------------|
| Pulmonologists should monitor for ILD progression using at least spirometry and measurement of diffusion capacity.                                                                                                                                                                             | 32                         | 96.9%                               |
| The decision to carry out PFTs (spirometry, measurement of lung volumes, and diffusion capacity) when following up with a patient with ILD depends on the specific diagnosis, disease severity, and treatment.                                                                                 | 32                         | 93.8%                               |
| It is important to discuss pulmonary rehabilitation; lung transplant and clinical trial opportunities; symptom management; advanced care planning and goals of care; and palliative care when managing patients with ILD.                                                                      | 32                         | 100%                                |
| Patients with any CTD-associated ILD should be co-managed with a rheumatologist and pulmonologist.                                                                                                                                                                                             | 33                         | 97.0%                               |
| Shared decision-making with ILD patients is important when prescribing treatment.                                                                                                                                                                                                              | 33                         | 3 (0)*                              |
| <b>5. Specialist referral</b>                                                                                                                                                                                                                                                                  |                            |                                     |
| Pulmonologists should consider referral of a patient with ILD to a specialist ILD or PFF centre if there is diagnostic or treatment uncertainty, the patient requests referral, the patient is a transplant or clinical trial candidate, or if there is disease progression despite treatment. | 32                         | 100%                                |

| <b>Consensus statement</b>                                                                                                                                                                                                                                                                    | <b>Number of responses</b> | <b>Level of consensus agreement</b> |
|-----------------------------------------------------------------------------------------------------------------------------------------------------------------------------------------------------------------------------------------------------------------------------------------------|----------------------------|-------------------------------------|
| Patients with IPF should receive early referral to an ILD centre if they are young at disease onset, transplant eligible, or have rapid disease progression.                                                                                                                                  | 33                         | 100%                                |
| Patients who are potential transplant candidates or have rapidly progressing disease should be given priority access to an ILD centre upon referral.                                                                                                                                          | 33                         | 100%                                |
| When selecting an ILD centre for referral of a patient with ILD, a pulmonologist should consider whether they are part of the PFF Care Center Network, have clinical trial opportunities, and if they are a lung transplant centre, as well as their reputation and proximity to the patient. | 31                         | 96.8%                               |
| Referring physicians should always share all relevant patient medical records when referring to an academic centre.                                                                                                                                                                           | 38                         | 100%                                |
| When referring a patient with ILD to a specialist ILD or PFF centre, the referral package should ideally contain the PFT history, CT scan images and reports, biopsy results, serologies if available, pulmonary and rheumatology clinic notes, and reasons for referral.                     | 32                         | 100%                                |
| When referring a patient with ILD to a specialist ILD or PFF centre, the referral package should state whether the patient should be returned to community care after consultation.                                                                                                           | 30                         | 90.0%                               |
| It should be the shared responsibility of the referring community physician, the pulmonologist at the ILD centre and                                                                                                                                                                          | 32                         | 93.8%                               |

| <b>Consensus statement</b>                                                                                                                                                                                                | <b>Number of responses</b> | <b>Level of consensus agreement</b> |
|---------------------------------------------------------------------------------------------------------------------------------------------------------------------------------------------------------------------------|----------------------------|-------------------------------------|
| the patient to ensure that the referral package is shared with the ILD centre.                                                                                                                                            |                            |                                     |
| Sharing the referral package with the ILD centre on referral should not be the responsibility of the patient alone.                                                                                                       | 32                         | 93.8%                               |
| A reasonable access time to a specialist ILD or PFF centre upon referral is 4–6 weeks.                                                                                                                                    | 32                         | 96.9%                               |
| Telehealth should be made available in ILD centres.                                                                                                                                                                       | 42                         | 100%                                |
| Pulmonologists at ILD centres should review all records before carrying out any further tests on patients referred with ILD.                                                                                              | 33                         | 3 (1)*                              |
| ILD centres should share all relevant patient medical records when returning patients to community care.                                                                                                                  | 33                         | 3 (1)*                              |
| Following referral to an ILD centre, patients should be co-managed by a community pulmonologist and ILD centre if possible.                                                                                               | 31                         | 100%                                |
| Patients who are eligible for transplant, enrolled in clinical trials, have rapidly progressing or complex disease, or are receiving specialized treatment should remain in the care of a pulmonologist at an ILD centre. | 31                         | 100%                                |
| 27 *For statements assessed on a 7-point Likert scale, the data are median (IQR). The scale                                                                                                                               |                            |                                     |
| 28 was from –3 (strongly disagree) to +3 (strongly agree).                                                                                                                                                                |                            |                                     |

29 †Statements were developed based on high/unanimous consensus agreement achieved on  
30 two related questions at Survey 2, which were combined but were not presented to the  
31 panel.

32 6MWT, 6-minute walk test; ANA, antinuclear antibodies; CCP, cyclic citrullinated peptide;  
33 COPD, chronic obstructive pulmonary disease; CT, computed tomography; CTD, connective  
34 tissue disease; DLco, diffusing capacity of the lung for carbon monoxide; FVC, forced vital  
35 capacity; GERD, gastroesophageal reflux disease; HRCT, high-resolution computed  
36 tomography; IIP, idiopathic interstitial pneumonias; ILD, interstitial lung disease; IQR,  
37 interquartile range; MDD, multidisciplinary discussion; PCP, primary care physician; PFF,  
38 Pulmonary Fibrosis Foundation; PFT, pulmonary function test; RF, rheumatoid factor; SSA,  
39 Sjögren's-syndrome-related antigen A.

40

41 **Supplementary Results Table S3.** Guidelines: evolution of statements from Survey 1 to 3

| Survey 1 |                                                                           | Survey 2 |                                                                                            | Survey 3                                                                                                 |                                                                                         |
|----------|---------------------------------------------------------------------------|----------|--------------------------------------------------------------------------------------------|----------------------------------------------------------------------------------------------------------|-----------------------------------------------------------------------------------------|
| N        | Question/statement                                                        | N        | Question/statement                                                                         | N                                                                                                        | Question/statement                                                                      |
| 47       | The current guidelines on the diagnosis and management of ILD are clear.* | 1 (2)    | 40 The current guidelines on the diagnosis and management of ILD are not completely clear. | 36                                                                                                       | The current guidelines on the diagnosis and management of ILD are not completely clear. |
|          |                                                                           |          | <b>82.5% agreement</b>                                                                     | <b>94.4% agreement</b>                                                                                   |                                                                                         |
| 48       | Is there a need for increased awareness and education around ILD?         | 40       | There is a need for increased awareness and education around ILD for patients and PCPs.    |                                                                                                          |                                                                                         |
|          | 1. Patients                                                               | 87.5%    |                                                                                            |                                                                                                          |                                                                                         |
|          | 2. PCPs                                                                   | 97.9%    | <b>100% agreement</b>                                                                      |                                                                                                          |                                                                                         |
|          | 3. Pulmonologists                                                         | 68.8%    | 36                                                                                         | There is a need for increased awareness and education around ILD for pulmonologists and rheumatologists. |                                                                                         |
|          | 4. Rheumatologists                                                        | 66.7%    |                                                                                            |                                                                                                          |                                                                                         |
|          | 5. Cardiologists                                                          | 33.3%    |                                                                                            |                                                                                                          |                                                                                         |
|          | 6. Other                                                                  | 2.1%     |                                                                                            |                                                                                                          |                                                                                         |
|          |                                                                           |          | <b>97.2% agreement</b>                                                                     |                                                                                                          |                                                                                         |

| Survey 1 |                                                                            | Survey 2 |                                                                                                                | Survey 3 |                    |
|----------|----------------------------------------------------------------------------|----------|----------------------------------------------------------------------------------------------------------------|----------|--------------------|
| N        | Question/statement                                                         | N        | Question/statement                                                                                             | N        | Question/statement |
| 44       | Should PCPs have guidelines on what to look out for in ILD?                | 40       | There is a need for guidelines for PCPs that include when to suspect ILD and when to refer to a pulmonologist. |          |                    |
|          | 1. Yes                                                                     | 95.5%    |                                                                                                                |          |                    |
|          | 2. No                                                                      | 4.5%     | <b>100% agreement</b>                                                                                          |          |                    |
| 45       | Should PCPs have guidelines on when to refer a patient with possible ILD?  |          |                                                                                                                |          |                    |
|          | 1. Yes                                                                     | 97.8%    |                                                                                                                |          |                    |
|          | 2. No                                                                      | 2.2%     |                                                                                                                |          |                    |
| 41       | Do PCPs need more guidance on PFTs?                                        | 38       | PCPs need more guidance on PFTs.                                                                               |          |                    |
|          | 1. Yes                                                                     | 100%     | <b>100% agreement</b>                                                                                          |          |                    |
|          | 2. No                                                                      | 0%       |                                                                                                                |          |                    |
| 43       | Do radiologists need additional guidance on what to include in CT reports? | 37       | Radiologists need additional guidance on what to include in CT reports.                                        |          |                    |
|          | 1. Yes                                                                     | 81.4%    |                                                                                                                |          |                    |

| Survey 1 |                                                                                                                | Survey 2 |                                                                                            | Survey 3 |                                                                           |
|----------|----------------------------------------------------------------------------------------------------------------|----------|--------------------------------------------------------------------------------------------|----------|---------------------------------------------------------------------------|
| N        | Question/statement                                                                                             | N        | Question/statement                                                                         | N        | Question/statement                                                        |
|          | 2. No                                                                                                          | 18.6%    | <b>94.6% agreement</b>                                                                     |          |                                                                           |
| 41       | Do pulmonologists need further guidance on how to manage and when to refer patients with ILD to an ILD centre? | 35       | Pulmonologists need further guidance on how to manage and when to refer patients with ILD. |          |                                                                           |
|          | 1. Yes                                                                                                         | 80.5%    | <b>94.3% agreement</b>                                                                     |          |                                                                           |
|          | 2. No                                                                                                          | 19.5%    |                                                                                            |          |                                                                           |
| 32       | Do ILD centres need additional guidance on co-management of patients with ILD?                                 | 34       | ILD centres need improved guidance on co-management of patients with ILD.                  | 36       | ILD centres need improved guidance on co-management of patients with ILD. |
|          | 1. Yes                                                                                                         | 62.5%    | <b>82.4% agreement</b>                                                                     |          |                                                                           |
|          | 2. No                                                                                                          | 37.5%    |                                                                                            |          | <b>97.2% agreement</b>                                                    |

42 \*For statements assessed on a 7-point Likert scale, the data are median (IQR). The scale was from -3 (strongly disagree) to +3 (strongly  
43 agree).

44 CT, computed tomography; ILD, interstitial lung disease; IQR, interquartile range; PCP, primary care physician; PFT, pulmonary function test.



45 **Supplementary Results Table S4.** Community screening: evolution of statements from Survey 1 to 3

| Survey 1 |                                                                                                                | Survey 2 |                                                                                                                                                                                | Survey 3               |                                                                                                                                                                   |
|----------|----------------------------------------------------------------------------------------------------------------|----------|--------------------------------------------------------------------------------------------------------------------------------------------------------------------------------|------------------------|-------------------------------------------------------------------------------------------------------------------------------------------------------------------|
| N        | Question/statement                                                                                             | N        | Question/statement                                                                                                                                                             | N                      | Question/statement                                                                                                                                                |
| 48       | Which of the following causes should a PCP explore in a patient presenting with chronic cough and/or dyspnoea? | 39       | PCPs should always consider ILD in patients with chronic cough and/or dyspnoea when cardiac disease, asthma, bronchitis, allergies, and GERD have been ruled out as the cause. | 36                     | PCPs should consider ILD in patients with chronic cough and/or dyspnoea when cardiac disease, asthma, bronchitis, and allergies have been ruled out as the cause. |
|          | 1. Cardiac                                                                                                     | 87.5%    | <b>94.9% agreement</b>                                                                                                                                                         | <b>97.2% agreement</b> |                                                                                                                                                                   |
|          | 2. Asthma                                                                                                      | 95.8%    |                                                                                                                                                                                |                        |                                                                                                                                                                   |
|          | 3. Bronchitis                                                                                                  | 83.3%    |                                                                                                                                                                                |                        |                                                                                                                                                                   |
|          | 4. Allergies                                                                                                   | 83.3%    |                                                                                                                                                                                |                        |                                                                                                                                                                   |
|          | 5. Pneumonia                                                                                                   | 62.5%    |                                                                                                                                                                                |                        |                                                                                                                                                                   |
|          | 6. Obesity                                                                                                     | 52.1%    |                                                                                                                                                                                |                        |                                                                                                                                                                   |
|          | 7. ILD                                                                                                         | 91.7%    |                                                                                                                                                                                |                        |                                                                                                                                                                   |
|          | 8. Autoimmune/rheumatologic                                                                                    | 54.2%    |                                                                                                                                                                                |                        |                                                                                                                                                                   |
|          | 9. Other                                                                                                       | 14.6%    |                                                                                                                                                                                |                        |                                                                                                                                                                   |

| Survey 1 |                                                                                           | Survey 2 |                                                                                                                                                                                                                                            | Survey 3               |                                                                                                                                                                                                                                                          |
|----------|-------------------------------------------------------------------------------------------|----------|--------------------------------------------------------------------------------------------------------------------------------------------------------------------------------------------------------------------------------------------|------------------------|----------------------------------------------------------------------------------------------------------------------------------------------------------------------------------------------------------------------------------------------------------|
| N        | Question/statement                                                                        | N        | Question/statement                                                                                                                                                                                                                         | N                      | Question/statement                                                                                                                                                                                                                                       |
| 48       | In the primary care setting, which of the following should be considered as signs of ILD? | 40       | In the primary care setting, ILD should always be considered in patients with any of the following: chronic cough, dyspnoea, crackles on auscultation, clubbing on fingernails, oxygen desaturation with ambulation, or hypoxemia at rest. | 36                     | In the primary care setting, ILD should be considered in patients with any of the following unexplained symptoms: chronic cough, dyspnoea, crackles on auscultation, clubbing on fingernails, oxygen desaturation with ambulation, or hypoxemia at rest. |
|          | 1. Chronic dry cough                                                                      | 97.9%    |                                                                                                                                                                                                                                            |                        |                                                                                                                                                                                                                                                          |
|          | 2. Dyspnoea                                                                               | 97.9%    |                                                                                                                                                                                                                                            |                        |                                                                                                                                                                                                                                                          |
|          | 3. Chest pain                                                                             | 8.3%     |                                                                                                                                                                                                                                            |                        |                                                                                                                                                                                                                                                          |
|          | 4. Chest tightness                                                                        | 16.7%    | <b>97.5% agreement</b>                                                                                                                                                                                                                     |                        |                                                                                                                                                                                                                                                          |
|          | 5. Wheezing                                                                               | 10.4%    |                                                                                                                                                                                                                                            |                        |                                                                                                                                                                                                                                                          |
|          | 6. Auscultatory crackles                                                                  | 95.8%    |                                                                                                                                                                                                                                            |                        |                                                                                                                                                                                                                                                          |
|          | 7. Clubbing of fingernails                                                                | 97.5%    |                                                                                                                                                                                                                                            |                        |                                                                                                                                                                                                                                                          |
|          | 8. Oxygen desaturation with ambulation                                                    | 93.8%    |                                                                                                                                                                                                                                            | <b>97.2% agreement</b> |                                                                                                                                                                                                                                                          |
|          | 9. Hypoxemia at rest                                                                      | 85.4%    |                                                                                                                                                                                                                                            |                        |                                                                                                                                                                                                                                                          |
|          | 10. Other                                                                                 | 4.2%     |                                                                                                                                                                                                                                            |                        |                                                                                                                                                                                                                                                          |

| Survey 1 |                                                                                                                                                                                                                                            | Survey 2 |                                                                                                                                                       | Survey 3 |                                                                                                                                                                                                                                    |
|----------|--------------------------------------------------------------------------------------------------------------------------------------------------------------------------------------------------------------------------------------------|----------|-------------------------------------------------------------------------------------------------------------------------------------------------------|----------|------------------------------------------------------------------------------------------------------------------------------------------------------------------------------------------------------------------------------------|
| N        | Question/statement                                                                                                                                                                                                                         | N        | Question/statement                                                                                                                                    | N        | Question/statement                                                                                                                                                                                                                 |
| 41       | If a patient presents with chronic cough and/or dyspnoea, should a PCP ask questions about CTD?<br><br>1. Yes<br>2. No                                                                                                                     | 38       | Patients presenting with chronic cough and/or dyspnoea in the primary care setting should be asked questions about CTD.<br><br><b>94.7% agreement</b> | 35       | Patients presenting with chronic cough and dyspnoea in the primary care setting should be asked questions in review of systems about CTD.<br><br><b>94.3% agreement</b>                                                            |
| 48       | Which of the following assessments should a PCP order/perform for a patient presenting with a chronic cough and/or dyspnoea in the primary care level?<br><br>1. Spirometry<br>2. Chest X-ray<br>3. Ambulatory oximetry/6MWT<br>4. CT scan | 39       | For patients with a chronic cough and/or dyspnoea, spirometry and chest X-ray should be ordered by the PCP.<br><br><b>94.9% agreement</b>             | 35       | For patients presenting with a chronic cough and dyspnoea, spirometry (if available at PCP office), chest X-ray and oximetry (including simple 500-foot ambulatory pulse oximetry with 3-point drop) should be ordered by the PCP. |
|          |                                                                                                                                                                                                                                            | 39       | Should a PCP perform/order oximetry for a patient presenting with a chronic cough and/or dyspnoea in the primary care level?<br><br>1. Yes            | 84.6%    |                                                                                                                                                                                                                                    |

| Survey 1 |                                                                       | Survey 2 |                                                                                                                                                                                                                   | Survey 3 |                                                                                                                                                                                                                                                               |
|----------|-----------------------------------------------------------------------|----------|-------------------------------------------------------------------------------------------------------------------------------------------------------------------------------------------------------------------|----------|---------------------------------------------------------------------------------------------------------------------------------------------------------------------------------------------------------------------------------------------------------------|
| N        | Question/statement                                                    | N        | Question/statement                                                                                                                                                                                                | N        | Question/statement                                                                                                                                                                                                                                            |
|          | 5. Echocardiogram                                                     | 47.9%    | 2. No                                                                                                                                                                                                             | 15.4%    | <b>85.7% agreement</b>                                                                                                                                                                                                                                        |
|          | 6. Oximetry                                                           | 75.0%    |                                                                                                                                                                                                                   |          |                                                                                                                                                                                                                                                               |
|          | 7. Other                                                              | 6.3%     |                                                                                                                                                                                                                   |          |                                                                                                                                                                                                                                                               |
| 46       | What clinical features should prompt a rheumatologist to suspect ILD? | 40       | Should rheumatologists always consider co-management with a pulmonologist for patients presenting with chronic dry/non-productive cough, dyspnoea, auscultatory crackles, or oxygen desaturation with ambulation? | 36       | Patients presenting in primary or rheumatology care with clinical features including chronic dry/non-productive cough, dyspnoea, auscultatory crackles and oxygen desaturation, which are not explained by workup, should be co-managed with a pulmonologist. |
|          | 1. Chronic dry/non-productive cough                                   | 93.8%    |                                                                                                                                                                                                                   |          |                                                                                                                                                                                                                                                               |
|          | 2. Dyspnoea                                                           | 93.8%    |                                                                                                                                                                                                                   |          |                                                                                                                                                                                                                                                               |
|          | 3. Chest pain                                                         | 12.5%    |                                                                                                                                                                                                                   |          |                                                                                                                                                                                                                                                               |
|          | 4. Chest tightness                                                    | 20.8%    | 1. Yes                                                                                                                                                                                                            | 95.0%    |                                                                                                                                                                                                                                                               |
|          | 5. Wheezing                                                           | 12.5%    | 2. No                                                                                                                                                                                                             | 5.0%     |                                                                                                                                                                                                                                                               |
|          | 6. Auscultatory crackles                                              | 89.6%    |                                                                                                                                                                                                                   |          |                                                                                                                                                                                                                                                               |
|          | 7. Oxygen desaturation with ambulation                                | 93.8%    |                                                                                                                                                                                                                   |          | <b>100% agreement</b>                                                                                                                                                                                                                                         |
|          | 8. Other                                                              | 6.3%     |                                                                                                                                                                                                                   |          |                                                                                                                                                                                                                                                               |

| Survey 1 |                                                                                   | Survey 2 |                                                                                                                                                                                                                                           | Survey 3 |                                                                                                                                                                                                                                                                         |
|----------|-----------------------------------------------------------------------------------|----------|-------------------------------------------------------------------------------------------------------------------------------------------------------------------------------------------------------------------------------------------|----------|-------------------------------------------------------------------------------------------------------------------------------------------------------------------------------------------------------------------------------------------------------------------------|
| N        | Question/statement                                                                | N        | Question/statement                                                                                                                                                                                                                        | N        | Question/statement                                                                                                                                                                                                                                                      |
| 46       | What clinical features should prompt a cardiologist to suspect ILD?               | 39       | Should cardiologists always consider concurrent workup or diagnostic testing with a pulmonologist for patients presenting with chronic dry/non-productive cough, dyspnoea, auscultatory crackles, or oxygen desaturation with ambulation? | 35       | Cardiologists should consider concurrent workup or diagnostic testing with a pulmonologist for patients who do not have cardiac dysfunction and present with chronic dry/non-productive cough, dyspnoea, auscultatory crackles, or oxygen desaturation with ambulation. |
|          | 1. Chronic dry/non-productive cough                                               | 95.8%    |                                                                                                                                                                                                                                           |          |                                                                                                                                                                                                                                                                         |
|          | 2. Dyspnoea                                                                       | 81.2%    |                                                                                                                                                                                                                                           |          |                                                                                                                                                                                                                                                                         |
|          | 3. Chest pain                                                                     | 4.2%     |                                                                                                                                                                                                                                           |          |                                                                                                                                                                                                                                                                         |
|          | 4. Chest tightness                                                                | 12.5%    | 1. Yes                                                                                                                                                                                                                                    | 84.6%    |                                                                                                                                                                                                                                                                         |
|          | 5. Wheezing                                                                       | 12.5%    | 2. No                                                                                                                                                                                                                                     | 15.4%    |                                                                                                                                                                                                                                                                         |
|          | 6. Auscultatory crackles                                                          | 87.5%    |                                                                                                                                                                                                                                           |          |                                                                                                                                                                                                                                                                         |
|          | 7. Oxygen desaturation with ambulation                                            | 89.6%    |                                                                                                                                                                                                                                           |          |                                                                                                                                                                                                                                                                         |
|          | 8. Other                                                                          | 6.3%     |                                                                                                                                                                                                                                           |          | <b>100% agreement</b>                                                                                                                                                                                                                                                   |
| 41       | If a patient has cough and/or dyspnoea with crackles on auscultation that are not | 40       | PCPs should always consider ILD if a patient has cough, dyspnoea, and crackles                                                                                                                                                            | 36       | PCPs, rheumatologists, and cardiologists should always                                                                                                                                                                                                                  |

| Survey 1 |                                                                                                                                                                                                | Survey 2 |                                                   | Survey 3 |                                                                                                               |
|----------|------------------------------------------------------------------------------------------------------------------------------------------------------------------------------------------------|----------|---------------------------------------------------|----------|---------------------------------------------------------------------------------------------------------------|
| N        | Question/statement                                                                                                                                                                             | N        | Question/statement                                | N        | Question/statement                                                                                            |
|          | explained by workup, should a PCP explore possible ILD?                                                                                                                                        |          | on auscultation that are not explained by workup. |          | consider ILD if a patient has cough, dyspnoea, and crackles on auscultation that are not explained by workup. |
|          | 1. Yes                                                                                                                                                                                         | 97.9%    | <b>100% agreement</b>                             |          |                                                                                                               |
|          | 2. No                                                                                                                                                                                          | 2.1%     |                                                   |          | <b>100% agreement</b>                                                                                         |
| 47       | If a patient with chronic cough and/or dyspnoea has an abnormal FVC on spirometry, bibasilar abnormalities on chest X-ray, and oxygen desaturation with ambulation, what should a PCP do next? |          |                                                   |          |                                                                                                               |
|          | 1. Refer to a pulmonologist                                                                                                                                                                    | 48.9%    |                                                   |          |                                                                                                               |
|          | 2. Order a CT scan                                                                                                                                                                             | 48.9%    |                                                   |          |                                                                                                               |
|          | 3. Carry out further diagnostic assessments                                                                                                                                                    | 2.1%     |                                                   |          |                                                                                                               |

| Survey 1 |                                                                                  | Survey 2 |                                                                                                                                                                                     | Survey 3 |                                                                                                                                                                                                                        |
|----------|----------------------------------------------------------------------------------|----------|-------------------------------------------------------------------------------------------------------------------------------------------------------------------------------------|----------|------------------------------------------------------------------------------------------------------------------------------------------------------------------------------------------------------------------------|
| N        | Question/statement                                                               | N        | Question/statement                                                                                                                                                                  | N        | Question/statement                                                                                                                                                                                                     |
|          | 4. Other                                                                         | 19.2%    |                                                                                                                                                                                     |          |                                                                                                                                                                                                                        |
| 45       | If ILD is suspected in a patient following workup, should a PCP order a CT scan? | 39       | If ILD is suspected in a patient following workup, a PCP should order a CT scan prior to pulmonologist referral if they are familiar with the correct imaging technique to request. | 36       | If ILD is suspected in a patient following workup, a PCP should order an HRCT scan prior to pulmonologist referral if they are familiar with the correct imaging technique to request and can ensure adequate quality. |
|          | 1. Yes                                                                           | 75.6%    |                                                                                                                                                                                     |          |                                                                                                                                                                                                                        |
|          | 2. No                                                                            | 24.4%    |                                                                                                                                                                                     |          |                                                                                                                                                                                                                        |
|          |                                                                                  |          | <b>89.7% agreement</b>                                                                                                                                                              |          |                                                                                                                                                                                                                        |
| 31       | If yes, should they order a CT scan prior to pulmonologist referral?             |          |                                                                                                                                                                                     |          |                                                                                                                                                                                                                        |
|          | 1. Yes                                                                           | 96.8%    |                                                                                                                                                                                     |          |                                                                                                                                                                                                                        |
|          | 2. No                                                                            | 3.2%     |                                                                                                                                                                                     |          |                                                                                                                                                                                                                        |
|          |                                                                                  |          |                                                                                                                                                                                     |          | <b>94.4% agreement</b>                                                                                                                                                                                                 |

| Survey 1 |                                                                                                                                   | Survey 2 |                                                                                                                 | Survey 3 |                                                                                             |
|----------|-----------------------------------------------------------------------------------------------------------------------------------|----------|-----------------------------------------------------------------------------------------------------------------|----------|---------------------------------------------------------------------------------------------|
| N        | Question/statement                                                                                                                | N        | Question/statement                                                                                              | N        | Question/statement                                                                          |
| 29       | If yes, is it clear what type of CT scan a PCP should be ordering?                                                                | 37       | Do PCPs need clearer guidance on ordering an HRCT scan for patients with suspected ILD?                         |          |                                                                                             |
|          | 1. Yes 72.4%                                                                                                                      |          | 1. Yes 100%                                                                                                     |          |                                                                                             |
|          | 2. No 17.6%                                                                                                                       |          | 2. No 0%                                                                                                        |          |                                                                                             |
| 29       | As a pulmonologist, would you prefer to have the HRCT in advance of a patient referral, or would you prefer to order it yourself? |          |                                                                                                                 |          |                                                                                             |
|          | 1. In advance 70.0%                                                                                                               |          |                                                                                                                 |          |                                                                                             |
|          | 2. Order own HRCT 30.0%                                                                                                           |          |                                                                                                                 |          |                                                                                             |
| 40       | If a patient with chronic cough and/or dyspnoea with normal FVC and chest X-ray does not respond to prescribed treatment or       | 39       | How long should a patient with chronic cough and/or dyspnoea with normal FVC and chest X-ray, not responding to | 36       | A different course of action should be considered after 1–3 months in patients with chronic |



| Survey 1 |                                                                                                                             | Survey 2 |                                                                                                                             | Survey 3 |                                                                                                                                                                                  |
|----------|-----------------------------------------------------------------------------------------------------------------------------|----------|-----------------------------------------------------------------------------------------------------------------------------|----------|----------------------------------------------------------------------------------------------------------------------------------------------------------------------------------|
| N        | Question/statement                                                                                                          | N        | Question/statement                                                                                                          | N        | Question/statement                                                                                                                                                               |
|          | management, how long should a PCP observe them before considering a different course of action?                             |          | prescribed treatment or management be observed in primary care before considering a different course of action?             |          | cough and/or dyspnoea with normal FVC and chest X-ray who do not respond to prescribed treatment or management in primary care, and a pulmonology referral should be considered. |
|          | 1. 0–3 months                                                                                                               | 58.3%    | 1. 1 month                                                                                                                  | 10.3%    |                                                                                                                                                                                  |
|          | 2. 3–6 months                                                                                                               | 39.6%    | 2. 2 months                                                                                                                 | 7.7%     |                                                                                                                                                                                  |
|          | 3. 6–9 months                                                                                                               | 2.1%     | 3. 3 months                                                                                                                 | 76.9%    |                                                                                                                                                                                  |
|          | 4. 9–12 months                                                                                                              | 0%       | 4. 4 months                                                                                                                 | 0%       |                                                                                                                                                                                  |
|          | 5. >12 months                                                                                                               | 0%       | 5. 5 months                                                                                                                 | 0%       | <b>97.2% agreement</b>                                                                                                                                                           |
|          |                                                                                                                             |          | 6. 6 months                                                                                                                 | 5.1%     |                                                                                                                                                                                  |
|          |                                                                                                                             |          | 7. >6 months                                                                                                                | 0%       |                                                                                                                                                                                  |
| 48       | If a patient with chronic cough and/or dyspnoea with normal FVC and chest X-ray does not respond to prescribed treatment or | 40       | If a patient with chronic cough and/or dyspnoea with normal FVC and chest X-ray does not respond to prescribed treatment or |          |                                                                                                                                                                                  |

| Survey 1 |                                                                                                                                                                      | Survey 2 |                                                                                                                   | Survey 3 |                                                                                                   |
|----------|----------------------------------------------------------------------------------------------------------------------------------------------------------------------|----------|-------------------------------------------------------------------------------------------------------------------|----------|---------------------------------------------------------------------------------------------------|
| N        | Question/statement                                                                                                                                                   | N        | Question/statement                                                                                                | N        | Question/statement                                                                                |
|          | management, should a PCP consider referral to a pulmonologist?                                                                                                       |          | management in primary care, pulmonology referral should always be considered?                                     |          |                                                                                                   |
|          | 1. Yes                                                                                                                                                               | 97.9%    | <b>95.0% agreement</b>                                                                                            |          |                                                                                                   |
|          | 2. No                                                                                                                                                                | 2.1%     |                                                                                                                   |          |                                                                                                   |
| 44       | Should patients with a history of RA and no respiratory symptoms or crackles on lung auscultation be screened for ILD? Screening can include PFTs and/or CT imaging. | 31       | Should asymptomatic patients with a history of RA be screened for ILD with at least PFTs?                         | 35       | Further research is needed to determine which patients with RA would benefit from HRCT screening. |
|          | 1. Yes                                                                                                                                                               | 65.9%    | 1. Yes                                                                                                            | 77.4%    | <b>94.3% agreement</b>                                                                            |
|          | 2. No                                                                                                                                                                | 34.1%    | 2. No                                                                                                             | 22.6%    |                                                                                                   |
| 30       | If yes, which test(s) would you recommend?                                                                                                                           | 33       | Would you consider HRCT screening for ILD in asymptomatic patients with a history of RA if limited to 1 per year? |          |                                                                                                   |
|          | 1. Only spirometry,* no HRCT                                                                                                                                         | 3.3%     |                                                                                                                   |          |                                                                                                   |
|          | 2. Full PFTs,† no HRCT                                                                                                                                               | 43.3%    |                                                                                                                   |          |                                                                                                   |
|          | 3. HRCT alone                                                                                                                                                        | 0%       | 1. Yes                                                                                                            | 60.6%    |                                                                                                   |

| Survey 1 |                                                                                                                                                                       | Survey 2 |                                                                                                                                                               | Survey 3 |                    |
|----------|-----------------------------------------------------------------------------------------------------------------------------------------------------------------------|----------|---------------------------------------------------------------------------------------------------------------------------------------------------------------|----------|--------------------|
| N        | Question/statement                                                                                                                                                    | N        | Question/statement                                                                                                                                            | N        | Question/statement |
|          | 4. Only spirometry* plus HRCT                                                                                                                                         | 3.3%     | 2. No                                                                                                                                                         | 39.4%    |                    |
|          | 5. Full PFTs <sup>†</sup> plus HRCT                                                                                                                                   | 50.0%    |                                                                                                                                                               |          |                    |
| 44       | Should patients with a history of SSc and no respiratory symptoms or crackles on lung auscultation be screened for ILD? Screening can include PFTs and/or CT imaging. | 38       | Patients with a history of SSc and no respiratory symptoms or crackles on lung auscultation should be screened for ILD using at least full PFTs. <sup>†</sup> |          |                    |
|          | 1. Yes                                                                                                                                                                | 93.2%    | <b>94.2% agreement</b>                                                                                                                                        |          |                    |
|          | 2. No                                                                                                                                                                 | 6.8%     |                                                                                                                                                               |          |                    |
| 41       | If yes, which test(s) would you recommend?                                                                                                                            |          |                                                                                                                                                               |          |                    |
|          | 1. Only spirometry,* no HRCT                                                                                                                                          | 2.4%     |                                                                                                                                                               |          |                    |
|          | 2. Full PFTs, <sup>†</sup> no HRCT                                                                                                                                    | 43.9%    |                                                                                                                                                               |          |                    |
|          | 3. HRCT alone                                                                                                                                                         | 0%       |                                                                                                                                                               |          |                    |
|          | 4. Only spirometry* plus HRCT                                                                                                                                         | 0%       |                                                                                                                                                               |          |                    |
|          | 5. Full PFTs <sup>†</sup> plus HRCT                                                                                                                                   | 53.7%    |                                                                                                                                                               |          |                    |

| Survey 1 |                                                                                                                                                                                      | Survey 2 |                                                                                                                                                                  | Survey 3 |                                                                                                                                                                  |
|----------|--------------------------------------------------------------------------------------------------------------------------------------------------------------------------------------|----------|------------------------------------------------------------------------------------------------------------------------------------------------------------------|----------|------------------------------------------------------------------------------------------------------------------------------------------------------------------|
| N        | Question/statement                                                                                                                                                                   | N        | Question/statement                                                                                                                                               | N        | Question/statement                                                                                                                                               |
| 41       | Should patients with a family history of familial PF and no respiratory symptoms or crackles on lung auscultation be screened for ILD? Screening can include PFTs and/or CT imaging. | 34       | Patients with a family history of familial PF and no respiratory symptoms or crackles on lung auscultation should be screened for ILD using at least full PFTs.† | 35       | Irrespective of respiratory symptoms, patients aged 50 years or older with a family history of familial PF should be screened for ILD using at least full PFTs.† |
|          | 1. Yes                                                                                                                                                                               | 70.7%    | <b>85.3% agreement</b>                                                                                                                                           |          | <b>83.9% agreement</b>                                                                                                                                           |
|          | 2. No                                                                                                                                                                                | 29.3%    |                                                                                                                                                                  |          |                                                                                                                                                                  |
| 29       | If yes, which test(s) would you recommend?                                                                                                                                           |          |                                                                                                                                                                  | 32       | Irrespective of respiratory symptoms, patients with RA, SSc, or a family history of familial PF should be screened for ILD using at least full PFTs.†            |
|          | 1. Only spirometry,* no HRCT                                                                                                                                                         | 6.9%     |                                                                                                                                                                  |          | <b>68.8% agreement</b>                                                                                                                                           |
|          | 2. Full PFTs,† no HRCT                                                                                                                                                               | 55.2%    |                                                                                                                                                                  |          |                                                                                                                                                                  |
|          | 3. HRCT alone                                                                                                                                                                        | 0%       |                                                                                                                                                                  |          |                                                                                                                                                                  |
|          | 4. Only spirometry* plus HRCT                                                                                                                                                        | 0%       |                                                                                                                                                                  |          |                                                                                                                                                                  |
|          | 5. Full PFTs† plus HRCT                                                                                                                                                              | 37.9%    |                                                                                                                                                                  |          |                                                                                                                                                                  |

| Survey 1 |                                                                                                                                                                                                          | Survey 2 |                                                                                                                                                                                                  | Survey 3 |                                                                                                                                                                                                                          |
|----------|----------------------------------------------------------------------------------------------------------------------------------------------------------------------------------------------------------|----------|--------------------------------------------------------------------------------------------------------------------------------------------------------------------------------------------------|----------|--------------------------------------------------------------------------------------------------------------------------------------------------------------------------------------------------------------------------|
| N        | Question/statement                                                                                                                                                                                       | N        | Question/statement                                                                                                                                                                               | N        | Question/statement                                                                                                                                                                                                       |
| 39       | Should patients with one first-degree relative with PF/IIP in the family and no respiratory symptoms or crackles on lung auscultation be screened for ILD? Screening can include PFTs and/or CT imaging. | 36       | Is further guidance needed on whether patients with one first-degree relative with PF/IIP in the family and no respiratory symptoms or crackles on lung auscultation should be screened for ILD? | 36       | Further research and guidance are needed to determine whether patients with one first-degree relative with PF/IIP in the family and no respiratory symptoms or crackles on lung auscultation should be screened for ILD. |
|          | 1. Yes 61.5%                                                                                                                                                                                             |          | 1. Yes 86.1%                                                                                                                                                                                     |          | <b>97.2% agreement</b>                                                                                                                                                                                                   |
|          | 2. No 38.5%                                                                                                                                                                                              |          | 2. No 13.9%                                                                                                                                                                                      |          |                                                                                                                                                                                                                          |
| 15       | If yes, which test(s) would you recommend?                                                                                                                                                               | 32       | Which patient groups should be screened with HRCT in addition to PFTs?                                                                                                                           | 36       | Patients with SSc should be screened for ILD using HRCT in addition to PFTs.                                                                                                                                             |
|          | 1. Only spirometry,* no HRCT 13.3%                                                                                                                                                                       |          | 1. Patients with RA 43.8%                                                                                                                                                                        |          | <b>72.7% agreement</b>                                                                                                                                                                                                   |
|          | 2. Full PFTs,† no HRCT 60.0%                                                                                                                                                                             |          | 2. Patients with SSc 87.5%                                                                                                                                                                       |          |                                                                                                                                                                                                                          |

| Survey 1               |                                                                          | Survey 2 |                                                                          | Survey 3 |                                                                                                                             |
|------------------------|--------------------------------------------------------------------------|----------|--------------------------------------------------------------------------|----------|-----------------------------------------------------------------------------------------------------------------------------|
| N                      | Question/statement                                                       | N        | Question/statement                                                       | N        | Question/statement                                                                                                          |
|                        | 3. HRCT alone                                                            | 0%       | 3. Patients with a family history of familial PF                         | 78.1%    | 36 Patients with a family history of familial PF should be screened for ILD using HRCT in addition to PFTs.                 |
|                        | 4. Only spirometry* plus HRCT                                            | 0%       | 4. Patients with one first-degree relative with PF/IIP in the family     | 37.5%    |                                                                                                                             |
|                        | 5. Full PFTs† plus HRCT                                                  | 26.7%    |                                                                          |          |                                                                                                                             |
| <b>69.7% agreement</b> |                                                                          |          |                                                                          |          |                                                                                                                             |
| 38                     | How often should an asymptomatic patient with a CTD be screened for ILD? | 33       | How often should an asymptomatic patient with a CTD be screened for ILD? | 33       | Patients with a CTD should be screened for ILD at baseline and then every 12–18 months depending on the underlying disease. |
|                        | 1. 0–3 months                                                            | 0%       | 1. < Every 9 months                                                      | 3.0%     | <b>90.9% agreement</b>                                                                                                      |
|                        | 2. 3–6 months                                                            | 5.3%     | 2. Every 9–10 months                                                     | 0%       |                                                                                                                             |
|                        | 3. 6–9 months                                                            | 7.9%     | 3. Every 11–12 months                                                    | 27.3%    |                                                                                                                             |
|                        | 4. 9–12 months                                                           | 36.8%    | 4. Every 12–13 months                                                    | 48.5%    |                                                                                                                             |
|                        | 5. >12 months                                                            | 50.0%    | 5. Every 13–14 months                                                    | 0%       |                                                                                                                             |
|                        |                                                                          |          | 6. Every 15–16 months                                                    | 3.0%     |                                                                                                                             |
|                        |                                                                          |          | 7. > Every 16 months                                                     | 18.2%    |                                                                                                                             |
| 46                     | *No measurement of lung volumes or diffusion capacity.                   |          |                                                                          |          |                                                                                                                             |

47 †Spirometry plus measurement of lung volumes and diffusion capacity.

48 6MWT, 6-minute walk test; CT, computed tomography; CTD, connective tissue disease; FVC, forced vital capacity; GERD, gastroesophageal

49 reflux disease; HRCT, high-resolution computed tomography; IIP, idiopathic interstitial pneumonias; ILD, interstitial lung disease; PCP, primary

50 care physician; PF, pulmonary fibrosis; PFT, pulmonary function test; RA, rheumatoid arthritis; SSc, systemic sclerosis.

51 **Supplementary Results Table S5.** Community diagnosis: evolution of statements from Survey 1 to 3

| Survey 1 |                                                                                                                                         | Survey 2 |                                                                                                                       | Survey 3 |                    |
|----------|-----------------------------------------------------------------------------------------------------------------------------------------|----------|-----------------------------------------------------------------------------------------------------------------------|----------|--------------------|
| N        | Question/statement                                                                                                                      | N        | Question/statement                                                                                                    | N        | Question/statement |
| 38       | From a pulmonologist's perspective, should questionnaires be used to obtain a detailed medical history of a patient with suspected ILD? | 33       | In patients with suspected ILD, questionnaires should be used to obtain a detailed medical history.                   |          |                    |
|          |                                                                                                                                         |          | <b>97.0% agreement</b>                                                                                                |          |                    |
|          | 1. Yes                                                                                                                                  | 94.7%    |                                                                                                                       |          |                    |
|          | 2. No                                                                                                                                   | 5.3%     |                                                                                                                       |          |                    |
| 32       | If yes, should ILD-specific questionnaires be used when a specific ILD diagnosis is being considered?                                   | 32       | When a specific ILD diagnosis is being considered, ILD-specific patient questionnaires should be used where possible. |          |                    |
|          |                                                                                                                                         |          | <b>93.8% agreement</b>                                                                                                |          |                    |
|          | 1. Yes                                                                                                                                  | 87.5%    |                                                                                                                       |          |                    |
|          | 2. No                                                                                                                                   | 12.5%    |                                                                                                                       |          |                    |
| 42       | Following referral to a pulmonologist, which                                                                                            | 33       |                                                                                                                       |          |                    |



| Survey 1 |                                                                                                                 | Survey 2 |                                                                                                                                                                                                                                                                                                                                                                         | Survey 3 |                    |
|----------|-----------------------------------------------------------------------------------------------------------------|----------|-------------------------------------------------------------------------------------------------------------------------------------------------------------------------------------------------------------------------------------------------------------------------------------------------------------------------------------------------------------------------|----------|--------------------|
| N        | Question/statement                                                                                              | N        | Question/statement                                                                                                                                                                                                                                                                                                                                                      | N        | Question/statement |
|          | clinical features would prompt you to order an HRCT scan in a patient with a non-productive cough and dyspnoea. |          | For patients with a non-productive cough and dyspnoea, an HRCT scan should be ordered if not already available following referral to a pulmonologist if they have any one of the following: auscultatory crackles, clubbing of fingernails, oxygen desaturation with ambulation, bibasilar abnormalities on chest X-ray, abnormal FVC, abnormal DLco, or confirmed CTD. |          |                    |
|          | 1. Chest pain                                                                                                   | 7.1%     |                                                                                                                                                                                                                                                                                                                                                                         |          |                    |
|          | 2. Chest tightness                                                                                              | 9.5%     |                                                                                                                                                                                                                                                                                                                                                                         |          |                    |
|          | 3. Wheezing                                                                                                     | 9.5%     |                                                                                                                                                                                                                                                                                                                                                                         |          |                    |
|          | 4. Auscultatory crackles                                                                                        | 97.6%    |                                                                                                                                                                                                                                                                                                                                                                         |          |                    |
|          | 5. Clubbing of fingernails                                                                                      | 92.9%    |                                                                                                                                                                                                                                                                                                                                                                         |          |                    |
|          | 6. Oxygen desaturation with ambulation                                                                          | 92.9%    |                                                                                                                                                                                                                                                                                                                                                                         |          |                    |
|          | 7. No obstruction on spirometry                                                                                 | 33.3%    |                                                                                                                                                                                                                                                                                                                                                                         |          |                    |
|          | 8. Bibasilar abnormalities on chest X-ray                                                                       | 92.9%    |                                                                                                                                                                                                                                                                                                                                                                         |          |                    |
|          | 9. Abnormal FVC                                                                                                 | 92.9%    |                                                                                                                                                                                                                                                                                                                                                                         |          |                    |
|          |                                                                                                                 |          | <b>100% agreement</b>                                                                                                                                                                                                                                                                                                                                                   |          |                    |

| Survey 1 |                                                                                                             | Survey 2 |                                                                                                                                                     | Survey 3 |                                                                                       |
|----------|-------------------------------------------------------------------------------------------------------------|----------|-----------------------------------------------------------------------------------------------------------------------------------------------------|----------|---------------------------------------------------------------------------------------|
| N        | Question/statement                                                                                          | N        | Question/statement                                                                                                                                  | N        | Question/statement                                                                    |
|          | 10. Abnormal DLco                                                                                           | 92.9%    |                                                                                                                                                     |          |                                                                                       |
|          | 11. Confirmed CTD                                                                                           | 90.5%    |                                                                                                                                                     |          |                                                                                       |
| 42       | What should a pulmonologist include in the workup of a patient with suspected ILD?                          | 32       | A pulmonologist should include medical history, physical examination, PFTs, serology, 6MWT, and HRCT in the workup of a patient with suspected ILD. |          |                                                                                       |
|          | 1. Medical history                                                                                          | 100%     |                                                                                                                                                     |          |                                                                                       |
|          | 2. Physical examination                                                                                     | 100%     |                                                                                                                                                     |          |                                                                                       |
|          | 3. PFTs                                                                                                     | 100%     | <b>96.9% agreement</b>                                                                                                                              |          |                                                                                       |
|          | 4. Serology                                                                                                 | 95.2%    |                                                                                                                                                     |          |                                                                                       |
|          | 5. 6MWT                                                                                                     | 83.3%    |                                                                                                                                                     |          |                                                                                       |
|          | 6. HRCT                                                                                                     | 100%     |                                                                                                                                                     |          |                                                                                       |
|          | 7. Other                                                                                                    | 4.8%     |                                                                                                                                                     |          |                                                                                       |
| 42       | What should the radiologist be told when they receive an HRCT requisition for a patient with suspected ILD? | 33       | When sending an HRCT requisition for a patient with suspected ILD to radiology, how                                                                 | 31       | When sending an HRCT requisition for a patient with suspected ILD to radiology, it is |

| Survey 1 |                                                                                         | Survey 2 |                                                                                                 | Survey 3 |                                                                                                                                                                                       |
|----------|-----------------------------------------------------------------------------------------|----------|-------------------------------------------------------------------------------------------------|----------|---------------------------------------------------------------------------------------------------------------------------------------------------------------------------------------|
| N        | Question/statement                                                                      | N        | Question/statement                                                                              | N        | Question/statement                                                                                                                                                                    |
|          |                                                                                         |          | important is it to explain each of the following?*                                              |          | important to specify whether expiratory, inspiratory, or both views are needed; whether prone, supine, or both images are needed; and that it needs to be presented in thin sections. |
|          | 1. Reasons for ordering HRCT                                                            | 100%     | 1. It needs to be presented in thin sections                                                    | 3 (1)    |                                                                                                                                                                                       |
|          | 2. It needs to be presented in thin sections                                            | 66.7%    | 2. Whether expiratory, inspiratory, or both views are needed                                    | 3 (1)    |                                                                                                                                                                                       |
|          | 3. Whether expiratory or inspiratory                                                    | 61.9%    | 3. Whether prone, supine, or both images are needed                                             | 2 (1)    | <b>87.1% agreement</b>                                                                                                                                                                |
|          | 4. Request no contrast image                                                            | 47.6%    |                                                                                                 |          |                                                                                                                                                                                       |
|          | 5. Other                                                                                | 21.4%    |                                                                                                 |          |                                                                                                                                                                                       |
| 42       | Which findings on HRCT scans are most valuable to a pulmonologist when considering ILD? |          | How important are each of the following HRCT findings to a pulmonologist when considering ILD?* |          |                                                                                                                                                                                       |

|                                                    |       |                                                                       |        |
|----------------------------------------------------|-------|-----------------------------------------------------------------------|--------|
| 1. Pattern as defined by<br>ATS/Fleischner Society | 88.1% | 1. Pattern as defined by<br>ATS/Fleischner Society                    | -2 (3) |
| 2. The radiologist's overall<br>impression         | 54.8% | 2. Presence/absence of<br>honeycombing                                | -2 (1) |
| 3. Differential diagnosis                          | 54.8% | 3. Presence/absence of<br>ground-glass opacities                      | -1 (0) |
| 4. Size of pulmonary artery                        | 40.5% | 4. Presence/absence of<br>reticulation                                | 0 (2)  |
| 5. Presence/absence of hiatal<br>hernia            | 45.2% | 5. Presence/absence of<br>bronchiectasis                              | 1 (1)  |
| 6. Presence/absence of<br>honeycombing             | 100%  | 6. Presence/absence of<br>emphysema                                   | 2 (1)  |
| 7. Presence/absence of<br>ground glass opacities   | 97.6% | 7. Presence/absence of cystic<br>changes and size,<br>characteristics | 2 (2)  |
| 8. Presence/absence of<br>reticulation             | 90.5% |                                                                       |        |
| 9. Presence/absence of<br>bronchiectasis           | 83.3% |                                                                       |        |

|                                                                  |       |
|------------------------------------------------------------------|-------|
| 10. Presence/absence of adenopathy                               | 61.9% |
| 11. Presence/absence of nodules or masses                        | 64.3% |
| 12. Presence/absence of emphysema                                | 73.8% |
| 13. Presence/absence of cystic changes and size, characteristics | 71.4% |
| 14. Presence/absence of pleural disease                          | 52.4% |
| 15. Distribution of findings                                     | 88.1% |
| 16. Quantification of disease presence                           | 61.9% |
| 17. Other                                                        | 2.4%  |

| Survey 1 |                                                                                                                | Survey 2 |                                                                                                                      | Survey 3                                                                                            |                    |
|----------|----------------------------------------------------------------------------------------------------------------|----------|----------------------------------------------------------------------------------------------------------------------|-----------------------------------------------------------------------------------------------------|--------------------|
| N        | Question/statement                                                                                             | N        | Question/statement                                                                                                   | N                                                                                                   | Question/statement |
| 41       | Where possible, radiologists should use a standardized template for reporting HRCT results in ILD.*            | 2 (1)    | 33                                                                                                                   | Where possible, radiologists should use a standardized template for reporting HRCT results in ILD.* | 2 (1)              |
| 42       | From a pulmonologist's perspective, what would you like to be included in an HRCT report from the radiologist? | 33       | The most important elements to include in an HRCT report are the description of features and the probable diagnosis. |                                                                                                     |                    |
|          | 1. Description of features                                                                                     | 97.6%    | <b>97.0% agreement</b>                                                                                               |                                                                                                     |                    |
|          | 2. Probable diagnosis                                                                                          | 81.0%    |                                                                                                                      |                                                                                                     |                    |
|          | 3. Recommendations for pulmonology referral                                                                    | 28.6%    |                                                                                                                      |                                                                                                     |                    |
|          | 4. Other                                                                                                       | 2.4%     |                                                                                                                      |                                                                                                     |                    |
| 42       | From a pulmonologist's perspective, in what circumstance would you recommend an MDD for the diagnosis of ILD?  | 33       | MDDs should take place during the                                                                                    |                                                                                                     |                    |

| Survey 1 |                                                                                     | Survey 2 |                                                                      | Survey 3 |                                                                                              |
|----------|-------------------------------------------------------------------------------------|----------|----------------------------------------------------------------------|----------|----------------------------------------------------------------------------------------------|
| N        | Question/statement                                                                  | N        | Question/statement                                                   | N        | Question/statement                                                                           |
|          | 1. Whenever ILD is suspected                                                        | 33.3%    | diagnosis of ILD if there is at least                                |          |                                                                                              |
|          | 2. If there is diagnostic uncertainty                                               | 88.1%    | diagnostic uncertainty or if any lung biopsy is being considered.    |          |                                                                                              |
|          | 3. Once ILD is confirmed to obtain a differential diagnosis                         | 33.3%    | <b>93.9% agreement</b>                                               |          |                                                                                              |
|          | 4. If CTD is suspected                                                              | 35.7%    | For what reasons is an MDD not needed if ILD is suspected?           | 30       | An MDD may not be required for cases of suspected ILD if there is no diagnostic uncertainty. |
|          | 5. If CTD is confirmed                                                              | 31.0%    | 1. Limited access to MDT                                             | 70.4%    |                                                                                              |
|          | 6. If considering any lung biopsy                                                   | 83.3%    | 2. It is too expensive                                               | 7.4%     |                                                                                              |
|          | 7. Following any lung biopsy                                                        | 64.3%    | 3. It takes too long                                                 | 33.3%    | <b>86.7% agreement</b>                                                                       |
|          | 8. Other                                                                            | 2.4%     | 4. Other                                                             | 44.4%    |                                                                                              |
| 42       | Do you (as a pulmonologist) have a local MDT available to facilitate ILD diagnosis? | 42       | Local ILD MDTs should consist of at least a pulmonologist, ideally a | 32       | Local ILD MDTs should consist of at least a pulmonologist, ideally a thoracic radiologist, a |
|          | 1. Yes                                                                              | 61.9%    |                                                                      |          |                                                                                              |

| Survey 1 |                                                                             | Survey 2 |                                                              | Survey 3 |                                                                                |
|----------|-----------------------------------------------------------------------------|----------|--------------------------------------------------------------|----------|--------------------------------------------------------------------------------|
| N        | Question/statement                                                          | N        | Question/statement                                           | N        | Question/statement                                                             |
| 26       | 2. No<br>If yes, who is part of your MDT?                                   | 38.1%    | thoracic radiologist, and pathologist with expertise in ILD. |          | pathologist with expertise in ILD, and a rheumatologist when CTD is suspected. |
|          | 1. General pulmonologist(s)                                                 | 61.5%    | <b>97.0% agreement</b>                                       |          | <b>100% agreement</b>                                                          |
|          | 2. ILD pulmonologist(s)                                                     | 88.5%    |                                                              |          |                                                                                |
|          | 3. General radiologist(s)                                                   | 11.5%    |                                                              |          |                                                                                |
|          | 4. Thoracic radiologist(s)                                                  | 92.3%    |                                                              |          |                                                                                |
|          | 5. General pathologist(s)                                                   | 23.1%    |                                                              |          |                                                                                |
|          | 6. Thoracic pathologist(s)                                                  | 76.9%    |                                                              |          |                                                                                |
|          | 7. Rheumatologist(s)                                                        | 61.5%    |                                                              |          |                                                                                |
|          | 8. Clinical nurse specialist(s)                                             | 42.3%    |                                                              |          |                                                                                |
|          | 9. Cardiothoracic surgeon(s)                                                | 15.4%    |                                                              |          |                                                                                |
|          | 10. Other                                                                   | 3.9%     |                                                              |          |                                                                                |
| 26       | How often do you meet with your MDT to discuss patients with suspected ILD? |          |                                                              |          |                                                                                |



| Survey 1 |                                                                              | Survey 2 |                                                                                      | Survey 3 |                    |
|----------|------------------------------------------------------------------------------|----------|--------------------------------------------------------------------------------------|----------|--------------------|
| N        | Question/statement                                                           | N        | Question/statement                                                                   | N        | Question/statement |
|          | 1. More than once per week                                                   | 0%       |                                                                                      |          |                    |
|          | 2. Once per week                                                             | 23.1%    |                                                                                      |          |                    |
|          | 3. Twice per month                                                           | 38.5%    |                                                                                      |          |                    |
|          | 4. Once per month                                                            | 30.8%    |                                                                                      |          |                    |
|          | 5. Less than once per month                                                  | 7.7%     |                                                                                      |          |                    |
| 40       | From a pulmonologist's perspective, what MDD or MDT structure do you prefer? | 33       | MDDs are most effective when all disciplines are involved (face to face or virtual). |          |                    |
|          | 1. Meeting in a virtual setting                                              | 45.0%    |                                                                                      |          |                    |
|          | 2. Meeting face to face                                                      | 62.5%    | <b>100% agreement</b>                                                                |          |                    |
|          | 3. Separate pulmonologist-driven discussions with each discipline            | 10.0%    |                                                                                      |          |                    |
|          | 4. Discussion with all disciplines together                                  | 87.5%    |                                                                                      |          |                    |

| Survey 1 |                                                                                          | Survey 2 |                    | Survey 3                                                                                   |                        |
|----------|------------------------------------------------------------------------------------------|----------|--------------------|--------------------------------------------------------------------------------------------|------------------------|
| N        | Question/statement                                                                       | N        | Question/statement | N                                                                                          | Question/statement     |
|          | 5. ILD expertise in each discipline                                                      | 67.5%    |                    |                                                                                            |                        |
|          | 6. Other                                                                                 | 5.0%     |                    |                                                                                            |                        |
| 42       | It is important to make a specific ILD diagnosis whenever possible (i.e., the subtype).* | 3 (1)    | 33                 | It is important to make a specific ILD diagnosis whenever possible (i.e., the subtype).*   | 3 (1)                  |
| 42       | Serology panel testing should always be ordered when ILD is suspected or diagnosed.*     | 3 (1)    | 32                 | From a pulmonologist's perspective, at which point would you order a serologic panel test? | 32                     |
|          |                                                                                          |          |                    | 1. If ILD is suspected but not diagnosed, before HRCT                                      | 9.4%                   |
|          |                                                                                          |          |                    | 2. If ILD is suspected but not diagnosed, after HRCT                                       | 21.9%                  |
|          |                                                                                          |          |                    | 3. If ILD is diagnosed but before differential diagnosis                                   | 46.9%                  |
|          |                                                                                          |          |                    |                                                                                            | <b>96.9% agreement</b> |

| Survey 1 |                                                                                             | Survey 2 |                                                                                       | Survey 3 |                                                                                                                        |
|----------|---------------------------------------------------------------------------------------------|----------|---------------------------------------------------------------------------------------|----------|------------------------------------------------------------------------------------------------------------------------|
| N        | Question/statement                                                                          | N        | Question/statement                                                                    | N        | Question/statement                                                                                                     |
|          |                                                                                             |          | 4. If ILD is diagnosed and a differential diagnosis has been confirmed                | 21.9%    |                                                                                                                        |
|          |                                                                                             |          | 5. I would not order a serologic panel test                                           | 0%       |                                                                                                                        |
| 42       | In a patient with non-specific ILD symptoms, which serologies should a pulmonologist order? | 33       | In a patient with non-specific ILD symptoms, which serologies are essential to order? | 31       | In patients with non-specific ILD symptoms, the most important serologies to order are: ANA, CCP, RF, SSA, and Scl 70. |
|          | 1. ANA                                                                                      | 100%     | 1. ANA                                                                                | 100%     | <b>80.7% agreement</b>                                                                                                 |
|          | 2. CCP                                                                                      | 95.2%    | 2. CCP                                                                                | 97.0%    |                                                                                                                        |
|          | 3. RF                                                                                       | 97.6%    | 3. RF                                                                                 | 87.9%    |                                                                                                                        |
|          | 4. dsDNA                                                                                    | 61.9%    | 4. dsDNA                                                                              | 36.4%    |                                                                                                                        |
|          | 5. SSA                                                                                      | 81.0%    | 5. SSA                                                                                | 78.8%    |                                                                                                                        |
|          | 6. SSB                                                                                      | 78.6%    | 6. SSB                                                                                | 69.7%    |                                                                                                                        |
|          | 7. Scl 70                                                                                   | 83.3%    | 7. Scl 70                                                                             | 87.9%    |                                                                                                                        |

| Survey 1 |                                 | Survey 2 |                                 | Survey 3 |                    |
|----------|---------------------------------|----------|---------------------------------|----------|--------------------|
| N        | Question/statement              | N        | Question/statement              | N        | Question/statement |
|          | 8. ANCA (MPO/PR3)               | 66.7%    | 8. ANCA (MPO/PR3)               | 66.7%    |                    |
|          | 9. RNP                          | 66.7%    | 9. RNP                          | 51.5%    |                    |
|          | 10. Myositis-related antibodies | 73.8%    | 10. Myositis-related antibodies | 63.6%    |                    |
|          | 11. Other                       | 4.8%     |                                 |          |                    |

52 \*For statements assessed on a 7-point Likert scale, the data are median (IQR). The scale was from -3 (strongly disagree/not at all important) to  
53 +3 (strongly agree/extremely important).

54 6MWT, 6-minute walk test; ANA, antinuclear antibodies; ANCA, antineutrophil cytoplasmic antibodies; CCP, cyclic citrullinated peptide; CTD,  
55 connective tissue disease; DLco, diffusing capacity of the lung for carbon monoxide; dsDNA, double-stranded DNA; FVC, forced vital capacity;  
56 HRCT, high-resolution computed tomography; ILD, interstitial lung disease; IQR, interquartile range; MDD, multidisciplinary discussion; MDT,  
57 multidisciplinary team; MPO, myeloperoxidase; PFT, pulmonary function test; PR3, proteinase-3; RF, rheumatoid factor; RNP,  
58 ribonucleoprotein; SSA, Sjögren's-syndrome-related antigen A; SSB, Sjögren's-syndrome-related antigen B.

59 **Supplementary Results Table S6.** Community management: evolution of statements from Survey 1 to 3

| Survey 1 |                                                                                                    | Survey 2 |                                                                                                                                                                                                | Survey 3 |                                                                                                                                                         |
|----------|----------------------------------------------------------------------------------------------------|----------|------------------------------------------------------------------------------------------------------------------------------------------------------------------------------------------------|----------|---------------------------------------------------------------------------------------------------------------------------------------------------------|
| N        | Questions/statement                                                                                | N        | Questions/statement                                                                                                                                                                            | N        | Questions/statement                                                                                                                                     |
| 42       | As a pulmonologist, how often do you follow up with your ILD patients?<br><br>[Free text question] | 31       | How often should a pulmonologist follow up with their ILD patients?<br><br>1. Every 3 months 67.7%<br>2. Every 4 months 16.1%<br>3. Every 6 months 16.1%<br>4. >6 months between follow-ups 0% | 32       | Pulmonologists should follow up with their ILD patients every 3–6 months, depending on the diagnosis and disease severity.<br><br><b>100% agreement</b> |
|          |                                                                                                    | 33       | Should the period between follow-ups depend on the diagnosis and disease severity?<br><br>1. Yes 93.4%<br>2. No 6.6%                                                                           |          |                                                                                                                                                         |

| Survey 1 |                                                                                          | Survey 2 |                                                                                | Survey 3 |                                                                                                                                              |
|----------|------------------------------------------------------------------------------------------|----------|--------------------------------------------------------------------------------|----------|----------------------------------------------------------------------------------------------------------------------------------------------|
| N        | Questions/statement                                                                      | N        | Questions/statement                                                            | N        | Questions/statement                                                                                                                          |
| 42       | As a pulmonologist, how often do you perform PFTs when following up with an ILD patient? | 32       | When following up with a patient with ILD, how often should PFTs be performed? | 32       | The decision to carry out PFTs when following up with a patient with ILD depends on the specific diagnosis, disease severity, and treatment. |
|          | 1. Every time                                                                            | 33.3%    | 1. Every time                                                                  | 12.5%    | <b>93.8% agreement</b>                                                                                                                       |
|          | 2. Not every time                                                                        | 66.7%    | 2. Every 1–3 months                                                            | 21.9%    |                                                                                                                                              |
|          |                                                                                          |          | 3. Every 4–6 months                                                            | 50.0%    |                                                                                                                                              |
|          |                                                                                          |          | 4. Every 7–9 months                                                            | 0%       |                                                                                                                                              |
|          |                                                                                          |          | 5. Every 10–12 months                                                          | 15.6%    |                                                                                                                                              |
|          |                                                                                          | 33       | Should the frequency of PFTs depend on the diagnosis and disease severity?     |          |                                                                                                                                              |
|          |                                                                                          |          | 1. Yes                                                                         | 90.9%    |                                                                                                                                              |
|          |                                                                                          |          | 2. No                                                                          | 9.1%     |                                                                                                                                              |

| Survey 1 |                                                                                           | Survey 2 |                                                                                                                                                                                                                                                        | Survey 3 |                                                                                                                   |
|----------|-------------------------------------------------------------------------------------------|----------|--------------------------------------------------------------------------------------------------------------------------------------------------------------------------------------------------------------------------------------------------------|----------|-------------------------------------------------------------------------------------------------------------------|
| N        | Questions/statement                                                                       | N        | Questions/statement                                                                                                                                                                                                                                    | N        | Questions/statement                                                                                               |
| 42       | As a pulmonologist, how often do you order an HRCT when following up with an ILD patient? | 33       | As a pulmonologist, how often do you order an HRCT when following up with an ILD patient?                                                                                                                                                              | 32       | When following up with a patient with ILD, HRCT scans should be considered if clinical deterioration is observed. |
|          | 1. Every time                                                                             | 2.4%     | 1. Every 6–12 months                                                                                                                                                                                                                                   | 6.1%     | <b>96.9% agreement</b>                                                                                            |
|          | 2. Not every time                                                                         | 97.6%    | 2. Every year                                                                                                                                                                                                                                          | 15.2%    |                                                                                                                   |
|          |                                                                                           |          | 3. Every year if on treatment                                                                                                                                                                                                                          | 12.1%    |                                                                                                                   |
|          |                                                                                           |          | 4. Every 2–3 years                                                                                                                                                                                                                                     | 21.2%    |                                                                                                                   |
|          |                                                                                           |          | 5. If a clinical deterioration is observed                                                                                                                                                                                                             | 75.8%    |                                                                                                                   |
| 42       | What should the pulmonologist evaluate at follow-up visits?                               | 33       | At follow-up visits for patients with ILD, pulmonologists should evaluate disease progression, physical function, symptom severity, quality of life, suitability for clinical trials, suitability for lung transplant, and side effects of medication. |          |                                                                                                                   |
|          | 1. Disease progression                                                                    | 100%     |                                                                                                                                                                                                                                                        |          |                                                                                                                   |
|          | 2. Physical function                                                                      | 95.2%    |                                                                                                                                                                                                                                                        |          |                                                                                                                   |
|          | 3. Symptom severity                                                                       | 100%     |                                                                                                                                                                                                                                                        |          |                                                                                                                   |
|          | 4. Disease stage                                                                          | 54.8%    |                                                                                                                                                                                                                                                        |          |                                                                                                                   |

| Survey 1 |                                                                                         | Survey 2 |                                                                                  | Survey 3                                                                     |                                                                                                                        |
|----------|-----------------------------------------------------------------------------------------|----------|----------------------------------------------------------------------------------|------------------------------------------------------------------------------|------------------------------------------------------------------------------------------------------------------------|
| N        | Questions/statement                                                                     | N        | Questions/statement                                                              | N                                                                            | Questions/statement                                                                                                    |
|          | 5. Quality of life                                                                      | 92.9%    | <b>100% agreement</b>                                                            |                                                                              |                                                                                                                        |
|          | 6. Suitability for clinical trials                                                      | 88.1%    |                                                                                  |                                                                              |                                                                                                                        |
|          | 7. Suitability for lung transplant                                                      | 97.6%    |                                                                                  |                                                                              |                                                                                                                        |
|          | 8. Side effects of medication                                                           | 97.6%    |                                                                                  |                                                                              |                                                                                                                        |
|          | 9. Other                                                                                | 2.4%     |                                                                                  |                                                                              |                                                                                                                        |
| 42       | As a pulmonologist, what symptoms do you regularly assess/monitor in patients with ILD? | 33       | Cough, dyspnoea, and fatigue should be monitored regularly in patients with ILD. | –                                                                            | Cough, dyspnoea, fatigue, and the emotional well-being of patients should be monitored regularly in patients with ILD. |
|          |                                                                                         |          | <b>100% agreement</b>                                                            |                                                                              |                                                                                                                        |
|          | 1. Cough                                                                                | 97.6%    | 32                                                                               | Should the emotional well-being of patients with ILD be monitored regularly? |                                                                                                                        |
|          | 2. Dyspnoea                                                                             | 100%     |                                                                                  |                                                                              |                                                                                                                        |
|          | 3. Fatigue                                                                              | 88.1%    |                                                                                  | 1. Yes                                                                       | 100%                                                                                                                   |
|          | 4. Depression                                                                           | 35.7%    |                                                                                  | 2. No                                                                        | 0%                                                                                                                     |
|          | 5. Other                                                                                | 2.4%     |                                                                                  |                                                                              |                                                                                                                        |



| Survey 1 |                                                                                                                                                                                                                                                                     | Survey 2 |                                                                                                                                | Survey 3 |                                                                                                                                                  |
|----------|---------------------------------------------------------------------------------------------------------------------------------------------------------------------------------------------------------------------------------------------------------------------|----------|--------------------------------------------------------------------------------------------------------------------------------|----------|--------------------------------------------------------------------------------------------------------------------------------------------------|
| N        | Questions/statement                                                                                                                                                                                                                                                 | N        | Questions/statement                                                                                                            | N        | Questions/statement                                                                                                                              |
| 42       | As a pulmonologist, which patients do you co-manage with rheumatologists?<br>[Free text question]                                                                                                                                                                   | 33       | Patients with any CTD-associated ILD should be co-managed by a rheumatologist and pulmonologist.<br><br><b>97.0% agreement</b> |          |                                                                                                                                                  |
| 40       | From a pulmonologist's perspective, which assessments should you use to monitor for ILD progression?<br><br>1. Only spirometry,* no HRCT 7.5%<br>2. Full PFTs,† no HRCT 35.0%<br>3. HRCT alone 0%<br>4. Spirometry* plus HRCT 7.5%<br>5. Full PFTs† plus HRCT 50.0% | 32       | Pulmonologists should monitor for ILD progression using at least full PFTs.†<br><br><b>84.4% agreement</b>                     | 32       | Pulmonologists should monitor for ILD progression using at least spirometry and measurement of diffusion capacity.<br><br><b>96.9% agreement</b> |

| Survey 1 |                                                                                                                                 |       | Survey 2                                                                                      |                                                                                    |                                                                                                                                                                                                                           | Survey 3              |  |  |
|----------|---------------------------------------------------------------------------------------------------------------------------------|-------|-----------------------------------------------------------------------------------------------|------------------------------------------------------------------------------------|---------------------------------------------------------------------------------------------------------------------------------------------------------------------------------------------------------------------------|-----------------------|--|--|
| N        | Questions/statement                                                                                                             | N     | Questions/statement                                                                           | N                                                                                  | Questions/statement                                                                                                                                                                                                       |                       |  |  |
| 42       | Shared decision-making with ILD patients is important when prescribing treatment.‡                                              | 3 (1) | 33                                                                                            | Shared decision-making with ILD patients is important when prescribing treatment.‡ | 3 (0)                                                                                                                                                                                                                     |                       |  |  |
| 42       | As a pulmonologist, which of the following do you discuss with your patients when considering non-pharmacologic ILD management? | 33    | How important are each of the following non-pharmacologic aspects in ILD patient management?‡ | 32                                                                                 | It is important to discuss pulmonary rehabilitation; lung transplant and clinical trial opportunities; symptom management; advanced care planning and goals of care; and palliative care when managing patients with ILD. |                       |  |  |
|          | 1. Pulmonary rehabilitation                                                                                                     | 100%  | 1. Pulmonary rehabilitation                                                                   | 3 (1)                                                                              |                                                                                                                                                                                                                           |                       |  |  |
|          | 2. Support groups                                                                                                               | 69.1% | 2. Palliative care                                                                            | 2 (0)                                                                              |                                                                                                                                                                                                                           |                       |  |  |
|          | 3. Patient education materials                                                                                                  | 66.7% | 3. Clinical trial opportunities                                                               | 2 (1)                                                                              |                                                                                                                                                                                                                           |                       |  |  |
|          | 4. Palliative care                                                                                                              | 71.4% | 4. Lung transplant (if suitable)                                                              | 3 (1)                                                                              |                                                                                                                                                                                                                           |                       |  |  |
|          | 5. Clinical trial opportunities                                                                                                 | 78.6% | 5. Symptom management                                                                         | 3 (1)                                                                              |                                                                                                                                                                                                                           |                       |  |  |
|          | 6. Lung transplant (if suitable)                                                                                                | 97.6% | 6. Guidance on advanced care planning and goals of care                                       | 3 (1)                                                                              |                                                                                                                                                                                                                           |                       |  |  |
|          | 7. Symptom management                                                                                                           | 97.6% |                                                                                               |                                                                                    |                                                                                                                                                                                                                           | <b>100% agreement</b> |  |  |

| Survey 1 |                                                                                               | Survey 2 |                                                                                                                                                                             | Survey 3                                                                                  |                                                                                                                                                                                   |
|----------|-----------------------------------------------------------------------------------------------|----------|-----------------------------------------------------------------------------------------------------------------------------------------------------------------------------|-------------------------------------------------------------------------------------------|-----------------------------------------------------------------------------------------------------------------------------------------------------------------------------------|
| N        | Questions/statement                                                                           | N        | Questions/statement                                                                                                                                                         | N                                                                                         | Questions/statement                                                                                                                                                               |
|          | 8. Guidance on advanced care planning and goals of care                                       | 71.4%    |                                                                                                                                                                             |                                                                                           |                                                                                                                                                                                   |
|          | 9. Other                                                                                      | 2.4%     |                                                                                                                                                                             |                                                                                           |                                                                                                                                                                                   |
| 42       | Which common comorbidities should pulmonologists investigate/assess at ILD patient follow-up? | 33       | Common comorbidities that should be monitored/assessed in patients with ILD are pulmonary hypertension, GERD, sleep disordered breathing, and lung cancer (if appropriate). | –                                                                                         | Common comorbidities that should be monitored/assessed in patients with ILD are pulmonary hypertension, GERD, sleep disordered breathing, COPD, and lung cancer (if appropriate). |
|          | 1. Pulmonary hypertension                                                                     | 100%     | <b>100% agreement</b>                                                                                                                                                       |                                                                                           |                                                                                                                                                                                   |
|          | 2. GERD                                                                                       | 100%     |                                                                                                                                                                             |                                                                                           |                                                                                                                                                                                   |
|          | 3. COPD                                                                                       | 78.6%    |                                                                                                                                                                             |                                                                                           |                                                                                                                                                                                   |
|          | 4. CAD                                                                                        | 59.5%    |                                                                                                                                                                             |                                                                                           |                                                                                                                                                                                   |
|          | 5. Sleep disordered breathing                                                                 | 85.7%    |                                                                                                                                                                             |                                                                                           |                                                                                                                                                                                   |
|          | 6. Lung cancer screening (if appropriate based on history)                                    | 92.9%    |                                                                                                                                                                             |                                                                                           |                                                                                                                                                                                   |
|          | 7. Other                                                                                      | 2.4%     |                                                                                                                                                                             |                                                                                           |                                                                                                                                                                                   |
|          |                                                                                               |          | 32                                                                                                                                                                          | Should comorbid COPD be investigated/assessed by pulmonologists at ILD patient follow-up? |                                                                                                                                                                                   |
|          |                                                                                               |          |                                                                                                                                                                             | 1. Yes                                                                                    | 96.9%                                                                                                                                                                             |
|          |                                                                                               |          |                                                                                                                                                                             | 2. No                                                                                     | 3.1%                                                                                                                                                                              |

60 \*No measurement of lung volumes or diffusion capacity.

61 †Spirometry plus measurement of lung volumes and diffusion capacity.

62 ‡For statements assessed on a 7-point Likert scale, the data are median (IQR). The scale was from –3 (strongly disagree/not at all important) to

63 +3 (strongly agree/extremely important).

64 CAD, coronary artery disease; COPD, chronic obstructive pulmonary disease; CTD, connective tissue disease; GERD, gastroesophageal reflux

65 disease; HRCT, high-resolution computed tomography; ILD, interstitial lung disease; IQR, interquartile range; PFT, pulmonary function test.

66 **Supplementary Results Table S7.** Specialist referral: evolution of statements from Survey 1 to 3

| Survey 1 |                                                                                                                          | Survey 2 |                                                                                                              | Survey 3 |                                                                                                                                                                                                                                                                                               |
|----------|--------------------------------------------------------------------------------------------------------------------------|----------|--------------------------------------------------------------------------------------------------------------|----------|-----------------------------------------------------------------------------------------------------------------------------------------------------------------------------------------------------------------------------------------------------------------------------------------------|
| N        | Question/statement                                                                                                       | N        | Question/statement                                                                                           | N        | Question/statement                                                                                                                                                                                                                                                                            |
| 42       | How should a pulmonologist identify an academic centre/ILD specialist to refer a patient to?<br><br>[Free text question] | 33       | What are the most important factors when selecting an academic centre/ILD specialist to refer a patient to?* | 31       | When selecting an ILD centre for referral of a patient with ILD, a pulmonologist should consider whether they are part of the PFF Care Center Network, have clinical trial opportunities, and if they are a lung transplant centre, as well as their reputation and proximity to the patient. |
|          |                                                                                                                          |          | 1. Proximity to patient                                                                                      | 2 (0)    |                                                                                                                                                                                                                                                                                               |
|          |                                                                                                                          |          | 2. If they are a lung transplant centre                                                                      | 2 (1)    |                                                                                                                                                                                                                                                                                               |
|          |                                                                                                                          |          | 3. If they have clinical trial opportunities                                                                 | 2 (1)    |                                                                                                                                                                                                                                                                                               |
|          |                                                                                                                          |          | 4. If they are a PFF ILD Center of Excellence                                                                | 2 (1)    |                                                                                                                                                                                                                                                                                               |
|          |                                                                                                                          |          | 5. If they have a good reputation                                                                            | 2 (0)    | <b>96.8% agreement</b>                                                                                                                                                                                                                                                                        |
| 42       | Which IPF patients should receive early referral to an ILD centre?                                                       | 33       | Patients with IPF should receive early referral to an ILD centre if they are young at                        |          |                                                                                                                                                                                                                                                                                               |

| Survey 1 |                                                          | Survey 2 |                                                                                                                                                                                                                          | Survey 3 |                                                                                                                                                                                                                               |
|----------|----------------------------------------------------------|----------|--------------------------------------------------------------------------------------------------------------------------------------------------------------------------------------------------------------------------|----------|-------------------------------------------------------------------------------------------------------------------------------------------------------------------------------------------------------------------------------|
| N        | Question/statement                                       | N        | Question/statement                                                                                                                                                                                                       | N        | Question/statement                                                                                                                                                                                                            |
|          | 1. Familial IPF                                          | 69.1%    | disease onset, transplant eligible, or have                                                                                                                                                                              |          |                                                                                                                                                                                                                               |
|          | 2. Early age at disease onset                            | 83.3%    | rapid disease progression.                                                                                                                                                                                               |          |                                                                                                                                                                                                                               |
|          | 3. Rapid progression                                     | 85.7%    | <b>100% agreement</b>                                                                                                                                                                                                    |          |                                                                                                                                                                                                                               |
|          | 4. Transplant eligible                                   | 100%     |                                                                                                                                                                                                                          |          |                                                                                                                                                                                                                               |
|          | 5. Other                                                 | 2.4%     |                                                                                                                                                                                                                          |          |                                                                                                                                                                                                                               |
| 42       | When should a patient be referred to an academic centre? | 33       | Patients with ILD should be referred to an academic centre if diagnostic uncertainty remains, there is treatment uncertainty, the patient requests referral, or the patient is a transplant or clinical trial candidate. | 32       | Pulmonologists should consider referral of a patient with ILD to a specialist ILD or PFF centre if there is diagnostic or treatment uncertainty, the patient requests referral, the patient is a transplant or clinical trial |
|          | 1. If biopsy is being considered                         | 40.5%    |                                                                                                                                                                                                                          |          |                                                                                                                                                                                                                               |
|          | 2. To confirm diagnosis already made                     | 23.8%    |                                                                                                                                                                                                                          |          |                                                                                                                                                                                                                               |
|          | 3. If diagnostic uncertainty remains                     | 92.9%    | <b>97.0% agreement</b>                                                                                                                                                                                                   |          |                                                                                                                                                                                                                               |
|          | 4. If no access to MDD or MDT                            | 52.4%    | 31 Should a patient with ILD that has progressed despite treatment be referred to an academic centre?                                                                                                                    |          |                                                                                                                                                                                                                               |

| Survey 1 |                                                          | Survey 2 |                    | Survey 3 |                                                                  |
|----------|----------------------------------------------------------|----------|--------------------|----------|------------------------------------------------------------------|
| N        | Question/statement                                       | N        | Question/statement | N        | Question/statement                                               |
|          | 5. If disease has progressed despite treatment           | 71.4%    | 1. Yes             | 93.6%    | candidate, or if there is disease progression despite treatment. |
|          |                                                          |          | 2. No              | 6.4%     |                                                                  |
|          | 6. If there is treatment uncertainty                     | 88.1%    |                    |          | <b>100% agreement</b>                                            |
|          | 7. If patient requests referral                          | 88.1%    |                    |          |                                                                  |
|          | 8. If patient is transplant candidate                    | 100%     |                    |          |                                                                  |
|          | 9. If patient is clinical trial candidate                | 90.5%    |                    |          |                                                                  |
|          | 10. If patient has any ILD                               | 14.3%    |                    |          |                                                                  |
|          | 11. If patient has IPF                                   | 21.4%    |                    |          |                                                                  |
|          | 12. If patient has familial IPF                          | 52.4%    |                    |          |                                                                  |
|          | 13. If patient has pulmonary hypertension as comorbidity | 40.5%    |                    |          |                                                                  |
|          | 14. Other                                                | 4.8%     |                    |          |                                                                  |

| Survey 1 |                                                                                                          | Survey 2 |                                                                                                                       | Survey 3 |                                                                                           |
|----------|----------------------------------------------------------------------------------------------------------|----------|-----------------------------------------------------------------------------------------------------------------------|----------|-------------------------------------------------------------------------------------------|
| N        | Question/statement                                                                                       | N        | Question/statement                                                                                                    | N        | Question/statement                                                                        |
| 42       | Should telehealth be made available in ILD centres to improve accessibility?                             | –        | Telehealth should be made available in ILD centres.                                                                   |          |                                                                                           |
|          | 1. Yes                                                                                                   |          |                                                                                                                       |          | 100%                                                                                      |
|          | 2. No                                                                                                    |          |                                                                                                                       |          | 0%                                                                                        |
| 38       | When should referring physicians share patient medical records with an ILD centre?                       | –        | Referring physicians should always share all relevant patient medical records when referring to an academic centre.   |          |                                                                                           |
|          | 1. Always                                                                                                |          |                                                                                                                       |          | 100%                                                                                      |
|          | 2. Only if it does not cause delays                                                                      |          |                                                                                                                       |          | 0%                                                                                        |
|          | 3. Never                                                                                                 |          |                                                                                                                       |          | 0%                                                                                        |
| 42       | What should be included in the referral package when referring a patient with ILD to an academic centre? | 33       | When referring a patient with ILD to an academic centre, the referral package should contain the PFT history, CT scan | 32       | When referring a patient with ILD to a specialist ILD or PFF centre, the referral package |



| Survey 1 |                              | Survey 2 |                                             | Survey 3 |                                |
|----------|------------------------------|----------|---------------------------------------------|----------|--------------------------------|
| N        | Question/statement           | N        | Question/statement                          | N        | Question/statement             |
|          | 1. PFT history               | 100%     | images and reports, biopsy results,         |          | should ideally contain the PFT |
|          | 2. CT scan images            | 100%     | pulmonary and rheumatology clinic notes,    |          | history, CT scan images and    |
|          | 3. Biopsy results            | 97.6%    | and reasons for referral.                   |          | reports, biopsy results,       |
|          | 4. Pulmonary and             | 100%     | <b>100% agreement</b>                       |          | serologies (if available),     |
|          | rheumatology clinic notes    |          |                                             |          | pulmonary and rheumatology     |
|          | 5. Reasons for referral      | 100%     |                                             |          | clinic notes, and reasons for  |
|          | 6. Whether patient should be | 71.4%    |                                             |          | referral.                      |
|          | returned to community care   |          |                                             |          | <b>100% agreement</b>          |
|          | after consultation           |          |                                             |          |                                |
|          | 7. Other                     | 7.1%     | 30 When referring a patient with ILD to an  | 30       | When referring a patient with  |
|          |                              |          | academic centre, should the referral        |          | ILD to a specialist ILD or PFF |
|          |                              |          | package state whether the patient should be |          | centre, the referral package   |
|          |                              |          | returned to community care after            |          | should state whether the       |
|          |                              |          | consultation?                               |          | patient should be returned to  |

| Survey 1 |                                                                                                                          | Survey 2 |                                                                                                                                                              | Survey 3 |                                                                                                                                                                                                      |
|----------|--------------------------------------------------------------------------------------------------------------------------|----------|--------------------------------------------------------------------------------------------------------------------------------------------------------------|----------|------------------------------------------------------------------------------------------------------------------------------------------------------------------------------------------------------|
| N        | Question/statement                                                                                                       | N        | Question/statement                                                                                                                                           | N        | Question/statement                                                                                                                                                                                   |
|          |                                                                                                                          |          | 1. Yes                                                                                                                                                       | 86.7%    | community care after                                                                                                                                                                                 |
|          |                                                                                                                          |          | 2. No                                                                                                                                                        | 13.3%    | consultation.                                                                                                                                                                                        |
|          |                                                                                                                          |          |                                                                                                                                                              |          | <b>90.0% agreement</b>                                                                                                                                                                               |
| 40       | Who should be responsible for ensuring the referral package is shared with the ILD centre on referral of an ILD patient? | 32       | If there is a shared responsibility for ensuring the referral package is shared with the ILD centre on referral of an ILD patient, who is it shared between? | 32       | It should be the shared responsibility of the referring community physician, the pulmonologist at the ILD centre, and the patient to ensure that the referral package is shared with the ILD centre. |
|          | 1. Referring community physician                                                                                         | 30.0%    | 1. Referring community physician and academic pulmonologist at ILD centre                                                                                    | 43.8%    |                                                                                                                                                                                                      |
|          | 2. Academic pulmonologist at ILD centre                                                                                  | 5.0%     | 2. Referring community physician and patient                                                                                                                 | 12.5%    | <b>93.8% agreement</b>                                                                                                                                                                               |
|          | 3. Patient                                                                                                               | 2.5%     | 3. Patient and academic pulmonologist at ILD centre                                                                                                          | 6.3%     |                                                                                                                                                                                                      |
|          | 4. Shared responsibility                                                                                                 | 62.5%    |                                                                                                                                                              |          |                                                                                                                                                                                                      |

| Survey 1 |                                                                | Survey 2 |                                                                                                         | Survey 3                                                       |                                                                                                                     |
|----------|----------------------------------------------------------------|----------|---------------------------------------------------------------------------------------------------------|----------------------------------------------------------------|---------------------------------------------------------------------------------------------------------------------|
| N        | Question/statement                                             | N        | Question/statement                                                                                      | N                                                              | Question/statement                                                                                                  |
|          |                                                                | 4.       | Referring community physician, academic pulmonologist at ILD centre, and patient                        | 37.5%                                                          |                                                                                                                     |
|          |                                                                | 29       | The patient should not be responsible for sharing the referral package with the ILD centre on referral. |                                                                | 32                                                                                                                  |
|          |                                                                |          | <b>55.2% agreement</b>                                                                                  |                                                                | Sharing the referral package with the ILD centre on referral should not be the responsibility of the patient alone. |
|          |                                                                |          |                                                                                                         |                                                                | <b>93.8% agreement</b>                                                                                              |
| 42       | Pulmonologists at ILD centres should review all records before | 3 (1)    | 33                                                                                                      | Pulmonologists at ILD centres should review all records before | 3 (1)                                                                                                               |

| Survey 1 |                                                                                                                                                         | Survey 2 |                                                                                                                                                                                   | Survey 3 |                                                                                                                      |
|----------|---------------------------------------------------------------------------------------------------------------------------------------------------------|----------|-----------------------------------------------------------------------------------------------------------------------------------------------------------------------------------|----------|----------------------------------------------------------------------------------------------------------------------|
| N        | Question/statement                                                                                                                                      | N        | Question/statement                                                                                                                                                                | N        | Question/statement                                                                                                   |
|          | carrying out any further tests on patients referred with ILD.*                                                                                          |          | carrying out any further tests on patients referred with ILD.*                                                                                                                    |          |                                                                                                                      |
| 42       | What is a reasonable access time to an ILD centre upon referral?<br><br>[Free text question]                                                            | 33       | What is a reasonable access time to an ILD centre upon referral?<br><br>1. 1–3 weeks<br>2. 4–6 weeks<br>3. 7–9 weeks<br>4. 10–12 weeks                                            | 32       | A reasonable access time to a specialist ILD or PFF centre upon referral is 4–6 weeks.<br><br><b>96.9% agreement</b> |
| 42       | Which patients should receive priority access to an ILD centre upon referral?<br><br>1. Potential transplant candidates<br>2. Clinical trial candidates | 33       | Patients who are potential transplant candidates or have rapidly progressing disease should be given priority access to an ILD centre upon referral.<br><br><b>100% agreement</b> |          |                                                                                                                      |

| Survey 1 |                                                                                                               | Survey 2 |                    | Survey 3                                                                                                                    |                    |
|----------|---------------------------------------------------------------------------------------------------------------|----------|--------------------|-----------------------------------------------------------------------------------------------------------------------------|--------------------|
| N        | Question/statement                                                                                            | N        | Question/statement | N                                                                                                                           | Question/statement |
|          | 3. Patients needing diagnostic procedures                                                                     | 50.0%    |                    |                                                                                                                             |                    |
|          | 4. Patients with rapid progression                                                                            | 92.9%    |                    |                                                                                                                             |                    |
|          | 5. Patients with familial PF                                                                                  | 28.6%    |                    |                                                                                                                             |                    |
|          | 6. Patients under age 65 years                                                                                | 47.6%    |                    |                                                                                                                             |                    |
|          | 7. Patients under age 75 years                                                                                | 9.5%     |                    |                                                                                                                             |                    |
|          | 8. Patients under age 85 years                                                                                | 2.4%     |                    |                                                                                                                             |                    |
| 42       | ILD centres should share all relevant patient medical records when returning patients to community care.*     | 3 (0)    | 33                 | ILD centres should share all relevant patient medical records when returning patients to community care.*                   | 3 (1)              |
| 38       | From a pulmonologist's perspective, what should be the default patient pathway following ILD centre referral? | 31       | 31                 | Following referral to an ILD centre, patients should be co-managed by a community pulmonologist and ILD centre if possible. |                    |

| Survey 1 |                                                                                                                     | Survey 2 |                                                                                                                              | Survey 3 |                                                                                                                                                                                                                           |
|----------|---------------------------------------------------------------------------------------------------------------------|----------|------------------------------------------------------------------------------------------------------------------------------|----------|---------------------------------------------------------------------------------------------------------------------------------------------------------------------------------------------------------------------------|
| N        | Question/statement                                                                                                  | N        | Question/statement                                                                                                           | N        | Question/statement                                                                                                                                                                                                        |
|          | 1. Patients should be returned to community care                                                                    | 10.5%    | <b>100% agreement</b>                                                                                                        |          |                                                                                                                                                                                                                           |
|          | 2. Patients should remain at ILD centre                                                                             | 5.3%     |                                                                                                                              |          |                                                                                                                                                                                                                           |
|          | 3. Patients should be co-managed                                                                                    | 84.2%    |                                                                                                                              |          |                                                                                                                                                                                                                           |
| 42       | Which patients should remain in the care of an academic pulmonologist at an ILD centre?<br><br>[Free text question] | 33       | How important is it for each of the following patients to remain in the care of an academic pulmonologist at an ILD centre?* | 31       | Patients who are eligible for transplant, enrolled in clinical trials, have rapidly progressing or complex disease, or are receiving specialized treatment should remain in the care of a pulmonologist at an ILD centre. |
|          |                                                                                                                     |          | 1. Transplant patients                                                                                                       | 3 (1)    |                                                                                                                                                                                                                           |
|          |                                                                                                                     |          | 2. Clinical trial participants                                                                                               | 3 (1)    |                                                                                                                                                                                                                           |
|          |                                                                                                                     |          | 3. Patients with rapidly progressing disease                                                                                 | 3 (1)    |                                                                                                                                                                                                                           |
|          |                                                                                                                     |          | 4. Patients with complex disease                                                                                             | 2 (1)    | <b>100% agreement</b>                                                                                                                                                                                                     |

| Survey 1 |                    | Survey 2 |                                          | Survey 3 |                    |
|----------|--------------------|----------|------------------------------------------|----------|--------------------|
| N        | Question/statement | N        | Question/statement                       | N        | Question/statement |
|          |                    | 5.       | Patients receiving specialized treatment | 2 (1)    |                    |
|          |                    | 6.       | Patients with multiple comorbidities     | 2 (2)    |                    |

67 \*For statements assessed on a 7-point Likert scale, the data are median (IQR). The scale was from –3 (strongly disagree/not at all important) to  
 68 +3 (strongly agree/extremely important).

69 CT, computed tomography; ILD, interstitial lung disease; IPF, idiopathic pulmonary fibrosis; IQR, interquartile range; MDD, multidisciplinary  
 70 discussion; MDT, multidisciplinary team; PF, pulmonary fibrosis; PFF, Pulmonary Fibrosis Foundation; PFT, pulmonary function test.
